# Supplementary material for: Polycyclic aromatic hydrocarbon occurrence in forest soils in response to fires: a summary across sites
Source: Royal Society of Chemistry journal article supplement (doi:10.1039/d1em00377a), 2021-11-30
Supplement: d1em00377a1.pdf [file d1em00377a1.pdf]

## Supplementary information

### **Polycyclic aromatic hydrocarbon occurrences in forest soils in response to fires: a summary across sites**

Biwei Yang,<sup>1,2</sup> Yameng Shi,<sup>1</sup> Shan Xu,<sup>3</sup> Yinghui Wang,<sup>1</sup> Sifang Kong,<sup>4</sup> Zongwei Cai,<sup>2,\*</sup> and Junjian  
Wang<sup>1,\*</sup>

<sup>1</sup>*School of Environmental Science and Engineering, Southern University of Science and Technology,  
Shenzhen, China. E-mail: wangjj@sustech.edu.cn; Tel: +86 755 8801 8093*

<sup>2</sup>*State Key Laboratory of Environmental and Biological Analysis, Department of Chemistry, Hong  
Kong Baptist University, Hong Kong SAR, China. E-mail: zwcai@hkbu.edu.hk; Tel: +852 3411  
7070*

<sup>3</sup>*Department of Geography and Resource Management, The Chinese University of Hong Kong,  
Shatin, New Territories, Hong Kong SAR, China*

<sup>4</sup>*Department of Transportation and Environment, Shenzhen Institute of Information Technology,  
Shenzhen, China*

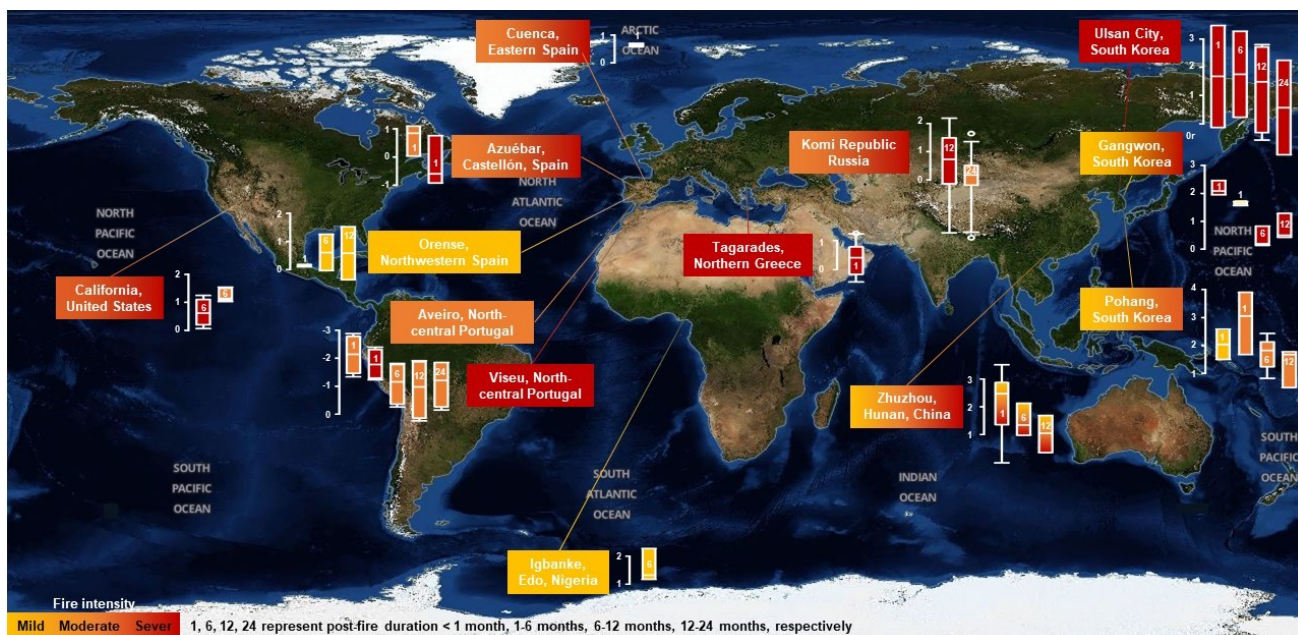

**Figure S1.** The geographical locations of study sites on the world map. The red, orange, and yellow colors indicate high-, moderate-, and mild-intensity fires, respectively. The box figures show the effect sizes of fire on the polycyclic aromatic hydrocarbon concentrations (i.e.,  $\ln RR$  of PAH concentrations). Numbers 1, 6, 12, 24 represent the post-fire duration of < 1 month, 1–6 months, 6–12 months, and 12–24 months, respectively.

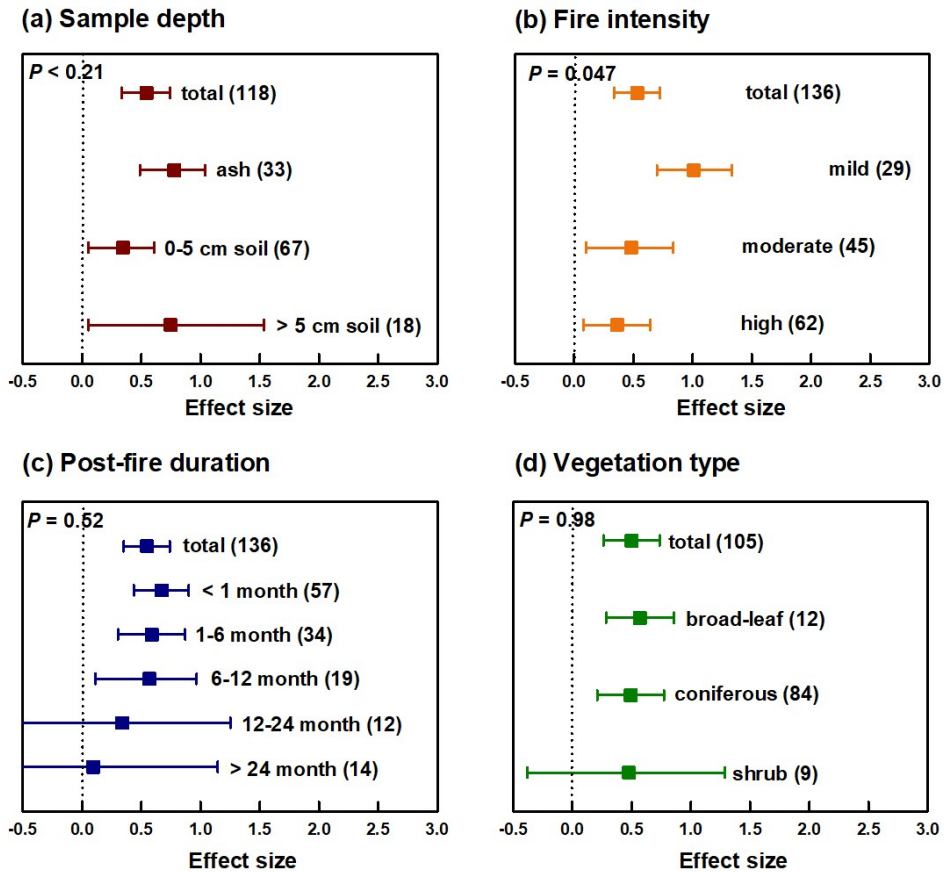

**Figure S2.** Changes in the PAH toxic equivalents at different (a) sample depth, (b) fire intensity, (c) post-fire duration, and (d) vegetation type. Effect sizes are given as mean weighted natural log response ratios (lnRR) and error bars display the 95% confidence intervals; an effect size of 0 indicates no change relative to the reference, while values  $> 0$  or  $< 0$  indicate an increase or decrease, respectively. Numbers in parentheses represent the number of observations (N) for each parameter.  $P < 0.05$  indicates significant between-group heterogeneity.

**Table S1.** Related parameters used in chronic daily intake calculation

| Parameter   | Meaning                  | Unit                | Child              | Adult              |
|-------------|--------------------------|---------------------|--------------------|--------------------|
| $IR_{soil}$ | Ingestion rate           | $mg \cdot d^{-1}$   | 200                | 100                |
| $IR_{air}$  | Inhalation rate          | $m^3 \cdot d^{-1}$  | 7.6                | 20                 |
| $EF$        | Exposure frequency       | $d \cdot a^{-1}$    | 180                | 180                |
| $ED$        | Exposure duration        | a                   | 6                  | 24                 |
| $CF$        | Conversion factor        | $kg \cdot mg^{-1}$  | $1 \times 10^{-6}$ | $1 \times 10^{-6}$ |
| $BW$        | Body weight              | kg                  | 15                 | 70                 |
| $AT$        | Average lifespan         | d                   | 25550              | 25550              |
| $SA$        | Dermal exposure area     | $cm^2$              | 1150               | 2145               |
| $AF_{soil}$ | Dermal adherence factor  | $mg \cdot cm^{-2}$  | 0.20               | 0.07               |
| $ABS$       | Dermal adsorption factor | -                   | 0.13               | 0.13               |
| $PEF$       | Particle emission factor | $m^3 \cdot kg^{-1}$ | $1.36 \times 10^9$ | $1.36 \times 10^9$ |

According to the Risk Assessment Guidance of US EPA

**Table S2.** Non-carcinogenic reference dose (RfD, kg·d·mg<sup>-1</sup>)

| Compound | Ingestion RfD <sub>ing</sub> | Dermal contact RfD <sub>derm</sub> | Inhalation RfD <sub>inh</sub> |
|----------|------------------------------|------------------------------------|-------------------------------|
| Nap      | 0.0004                       | 0.02                               | 0.0008                        |
| Acy      | 0.06                         | 0.03                               | 0.03                          |
| Ace      | 0.06                         | 0.03                               | 0.03                          |
| Flu      | 0.04                         | 0.02                               | 0.02                          |
| Phe      | 0.03                         | 0.015                              | 0.015                         |
| Ant      | 0.3                          | 0.15                               | 0.15                          |
| Flt      | 0.04                         | 0.02                               | 0.02                          |
| Pyr      | 0.03                         | 0.015                              | 0.015                         |
| BghiP    | 0.030                        | 0.015                              | 0.015                         |

According to the Risk Assessment Guidance of US EPA
