# Supplementary material for: Polycyclic aromatic hydrocarbon occurrence in forest soils in response to fires: a summary across sites
Source: Royal Society of Chemistry journal article supplement (doi:10.1039/d1em00377a), 2021-11-30
Supplement: d1em00377a5.xlsx [file d1em00377a5.xlsx]

## Sheet: Sheet1
														Reference	Reference	Reference	Reference	Reference	Reference	Reference	Reference	Reference	Reference	Reference	Reference	Reference	Reference	Reference	Reference	Reference	Reference	Reference	Reference	Reference	Reference	Reference	Reference	Reference	Reference	Reference	Post-fire	Post-fire	Post-fire	Post-fire	Post-fire	Post-fire	Post-fire	Post-fire	Post-fire
No.	Reference	Location and time of the fire	Fire type	Fire severity	Sampling plot description	Label in text	Soil sample type		Annual precipitation	Vegetation type		Post-fire duration	Number of PAHs species	Nap	Acy	Ace	Flu	Phe	Ant	Flt	Pyr	BaA	Chr	BbF	BkF	BaP	Ind	DahA	BghiP	benzo[e]pyrene	Coronene	triphenylene	∑concentration of PAHs	∑TEQ	2-4 ring PAHs	5-6 ring PAHs	2-4 ring PAHs/5-6 rings PAHs	Diagnose ratio			Nap	Acy	Ace	Flu	Phe	Ant	Flt	Pyr	BaA
									mm			day, month		ng/g dry	ng/g dry	ng/g dry	ng/g dry	ng/g dry	ng/g dry	ng/g dry	ng/g dry	ng/g dry	ng/g dry	ng/g dry	ng/g dry	ng/g dry	ng/g dry	ng/g dry	ng/g dry	ng/g dry	ng/g dry	ng/g dry	ng/g dry	ng/g dry	ng/g dry	ng/g dry	ng/g dry	Flt/(Flt+Pyr)	Ant/(Ant+Phe)	Ind/(Ind+BghiP)	ng/g dry	ng/g dry	ng/g dry	ng/g dry	ng/g dry	ng/g dry	ng/g dry	ng/g dry	ng/g dry
																																									2 ring PAH	3 ring PAH	3 ring PAH	3 ring PAH	3 ring PAH	3 ring PAH	4 ring PAH	4 ring PAH	4 ring PAH
1	Sampei, Uraoka et al. (2019)	Hikawa-cho Tobimura, Izumo city	Modern field fires		Lake sediments	20120609-4a				Rice hull chaff	Grass	2 days	8	not available	not available	not available	not available	not available	not available	not available	not available	not available	not available	not available	not available	not available	not available	not available	not available	not available	not available	not available	not available	not available	not available	not available	not available	not available	not available	not available	not available	not available	not available	not available	4.3	not available	4.5	not detected	not detected
1	Sampei, Uraoka et al. (2019)	Shinji-cho Shouwashinden, Matsue city	Modern field fires		Lake sediments	20130622-4,5				Wire grass	Grass	2 days	8	not available	not available	not available	not available	not available	not available	not available	not available	not available	not available	not available	not available	not available	not available	not available	not available	not available	not available	not available	not available	not available	not available	not available	not available	not available	not available	not available	not available	not available	not available	not available	not detected	not available	9.8	not detected	18.6
1	Sampei, Uraoka et al. (2019)	Shinji-cho Sasou, Matsue city	Modern field fires		Lake sediments	20130812-7				Wire grass	Grass	2 days	8	not available	not available	not available	not available	not available	not available	not available	not available	not available	not available	not available	not available	not available	not available	not available	not available	not available	not available	not available	not available	not available	not available	not available	not available	not available	not available	not available	not available	not available	not available	not available	not detected	not available	not detected	not detected	15.1
1	Sampei, Uraoka et al. (2019)	Shinji-cho Sasou, Matsue city	Modern field fires		Lake sediments	20130826-2				Wire grass	Grass	17 days	8	not available	not available	not available	not available	not available	not available	not available	not available	not available	not available	not available	not available	not available	not available	not available	not available	not available	not available	not available	not available	not available	not available	not available	not available	not available	not available	not available	not available	not available	not available	not available	not detected	not available	not detected	not detected	11.1
1	Sampei, Uraoka et al. (2019)	Shimane University	Experimental burning		Lake sediments	Pine tree F.				Soot and smoke from Pine needles			8	not available	not available	not available	not available	not available	not available	not available	not available	not available	not available	not available	not available	not available	not available	not available	not available	not available	not available	not available	not available	not available	not available	not available	not available	not available	not available	not available	not available	not available	not available	not available	44.6	not available	649	641	84.8
1	Sampei, Uraoka et al. (2019)	Shimane University	Experimental burning		Lake sediments	Pine tree Char.				Charcoaled Pine needles			8	not available	not available	not available	not available	not available	not available	not available	not available	not available	not available	not available	not available	not available	not available	not available	not available	not available	not available	not available	not available	not available	not available	not available	not available	not available	not available	not available	not available	not available	not available	not available	784	not available	1136	1006	98
1	Sampei, Uraoka et al. (2019)	Rakuzan park, Matsue City	Experimental burning		Lake sediments	Zelkova F.				Soot and smoke from Zelkova leaves			8	not available	not available	not available	not available	not available	not available	not available	not available	not available	not available	not available	not available	not available	not available	not available	not available	not available	not available	not available	not available	not available	not available	not available	not available	not available	not available	not available	not available	not available	not available	not available	361	not available	409	427	142
2	Campos, Abrantes et al. (2019)	Ermida area, Aveiro district, North-central Portugal, July 26, 2010	Forest wildfire	Moderate	Humic Cambisols	Ermida_BE_IAF_soil	< 2 cm mineral soil		1609	Eucalypt (BE)	Forest	Immediately (IAF)	15	not available	0.47±0.02	<0.50	<0.50	8.4±0.93	0.91±0.07	8.0±1.52	5.5±0.21	0.79±0.29	1.5±1.03	1.8±0.77	0.56±0.04	3.8±0.42	2.1±1.13	<0.50	2.6±0.03	not available	not available	not available	37.93	4.94	26.57	11.36	2.33891	0.592593	0.0977444	0.446809	not available	6.9±1.72	0.91±0.42	20.4±3.43	65.7±10.22	8.8±0.69	13.5±2.95	13.3±3.04	4.6±1.22
2	Campos, Abrantes et al. (2019)	Ermida area, Aveiro district, North-central Portugal, July 26, 2010	Forest wildfire	Moderate	Humic Cambisols	Ermida_BE_IAF_ash	Ash		1609	Eucalypt (BE)	Forest	Immediately (IAF)	15	not available	0.47±0.02	<0.50	<0.50	8.4±0.93	0.91±0.07	8.0±1.52	5.5±0.21	0.79±0.29	1.5±1.03	1.8±0.77	0.56±0.04	3.8±0.42	2.1±1.13	<0.50	2.6±0.03	not available	not available	not available	37.93	4.94	26.57	11.36	2.33891	0.592593	0.0977444	0.446809	not available	35.2±6.72	10.6±1.71	118±9.88	151±18.10	25.1±6.25	35.2±5.45	36.1±6.13	4.7±0.72
2	Campos, Abrantes et al. (2019)	Ermida area, Aveiro district, North-central Portugal, July 26, 2010	Forest wildfire	Moderate	Humic Cambisols	Ermida_BP_IAF_soil	< 2 cm mineral soil		1609	Pine (BP)	Forest	Immediately (IAF)	15	not available	0.47±0.02	<0.50	<0.50	8.4±0.93	0.91±0.07	8.0±1.52	5.5±0.21	0.79±0.29	1.5±1.03	1.8±0.77	0.56±0.04	3.8±0.42	2.1±1.13	<0.50	2.6±0.03	not available	not available	not available	37.93	4.94	26.57	11.36	2.33891	0.592593	0.0977444	0.446809	not available	14.1±5.51	1.7±0.74	27.0±6.25	90.3±24,63	12.1±4.10	26.4±5.82	27.2±7.44	9.6±3.21
2	Campos, Abrantes et al. (2019)	Ermida area, Aveiro district, North-central Portugal, July 26, 2010	Forest wildfire	Moderate	Humic Cambisols	Ermida_BP_IAF_ash	Ash		1609	Pine (BP)	Forest	Immediately (IAF)	15	not available	0.47±0.02	<0.50	<0.50	8.4±0.93	0.91±0.07	8.0±1.52	5.5±0.21	0.79±0.29	1.5±1.03	1.8±0.77	0.56±0.04	3.8±0.42	2.1±1.13	<0.50	2.6±0.03	not available	not available	not available	37.93	4.94	26.57	11.36	2.33891	0.592593	0.0977444	0.446809	not available	45.2±5.47	8.6±0.86	202±11.20	229±18.50	36.1±3.59	53.3±5.38	55.6±4.97	10.2±0.96
2	Campos, Abrantes et al. (2019)	São Pedro do Sul area, Viseu district, North-central Portugal, August 6, 2010	Forest wildfire	Sever	Humic Cambisols	S. Pedro_BE_IAF_soil	< 2 cm mineral soil		1064	Eucalypt (BE)	Forest	Immediately (IAF)	15	not available	0.47±0.02	<0.50	<0.50	8.4±0.93	0.91±0.07	8.0±1.52	5.5±0.21	0.79±0.29	1.5±1.03	1.8±0.77	0.56±0.04	3.8±0.42	2.1±1.13	<0.50	2.6±0.03	not available	not available	not available	37.93	4.94	26.57	11.36	2.33891	0.592593	0.0977444	0.446809	not available	5.8±0.68	0.66±0.20	16.1±2.07	61.8±7.85	8.4±1.40	8.6±1.23	15.2±4.79	4.6±1.06
2	Campos, Abrantes et al. (2019)	São Pedro do Sul area, Viseu district, North-central Portugal, August 6, 2010	Forest wildfire	Sever	Humic Cambisols	S. Pedro_BE_IAF_ash	Ash		1064	Eucalypt (BE)	Forest	Immediately (IAF)	15	not available	0.47±0.02	<0.50	<0.50	8.4±0.93	0.91±0.07	8.0±1.52	5.5±0.21	0.79±0.29	1.5±1.03	1.8±0.77	0.56±0.04	3.8±0.42	2.1±1.13	<0.50	2.6±0.03	not available	not available	not available	37.93	4.94	26.57	11.36	2.33891	0.592593	0.0977444	0.446809	not available	11.2±2.88	1.8±0.53	21.1±4.93	142±15.48	20.8±.4.47	33.7±1.21	35.7±0.70	2.9±0.76
2	Campos, Abrantes et al. (2019)	São Pedro do Sul area, Viseu district, North-central Portugal, August 6, 2010	Forest wildfire	Sever	Humic Cambisols	S. Pedro_BP_IAF_soil	< 2 cm mineral soil		1064	Pine (BP)	Forest	Immediately (IAF)	15	not available	0.47±0.02	<0.50	<0.50	8.4±0.93	0.91±0.07	8.0±1.52	5.5±0.21	0.79±0.29	1.5±1.03	1.8±0.77	0.56±0.04	3.8±0.42	2.1±1.13	<0.50	2.6±0.03	not available	not available	not available	37.93	4.94	26.57	11.36	2.33891	0.592593	0.0977444	0.446809	not available	14.2±2.88	1.8±0.53	24.7±5.75	47.3±2.91	7.3±0.63	19.2±3.45	21.6±6.44	4.1±0.48
2	Campos, Abrantes et al. (2019)	São Pedro do Sul area, Viseu district, North-central Portugal, August 6, 2010	Forest wildfire	Sever	Humic Cambisols	S. Pedro_BP_IAF_ash	Ash		1064	Pine (BP)	Forest	Immediately (IAF)	15	not available	0.47±0.02	<0.50	<0.50	8.4±0.93	0.91±0.07	8.0±1.52	5.5±0.21	0.79±0.29	1.5±1.03	1.8±0.77	0.56±0.04	3.8±0.42	2.1±1.13	<0.50	2.6±0.03	not available	not available	not available	37.93	4.94	26.57	11.36	2.33891	0.592593	0.0977444	0.446809	not available	36.3±14.57	4.9±1.24	61.3±13.86	146±13.79	21.4±6.07	37.1±6.33	48.4±9.10	5.2±0.68
2	Campos, Abrantes et al. (2019)	Ermida area, Aveiro district, North-central Portugal, July 26, 2010	Forest wildfire	Moderate	Humic Cambisols	Ermida_BE_4MAF_soil	< 2 cm mineral soil		1609	Eucalypt (BE)	Forest	4 months (4MAF)	15	not available	1.1±0.18	<0.50	0.76±0.01	9.3±2.40	1.1±0.22	9.8±2.41	8.6±1.89	1.5±1.04	2.7±2.57	6.6±1.44	1.5±0.13	2.9±0.86	2.4±0.92	<0.50	4.4±1.19	not available	not available	not available	53.66	4.89	35.36	18.3	1.93224	0.532609	0.105769	0.352941	not available	1.6±0.05	<0.50	5.0±1.69	14.5±4.04	2.2±0.62	10.3±2.84	9.6±1.84	1.9±0.71
2	Campos, Abrantes et al. (2019)	Ermida area, Aveiro district, North-central Portugal, July 26, 2010	Forest wildfire	Moderate	Humic Cambisols	Ermida_BE_4MAF_ash	Ash		1609	Eucalypt (BE)	Forest	4 months (4MAF)	15	not available	1.1±0.18	<0.50	0.76±0.01	9.3±2.40	1.1±0.22	9.8±2.41	8.6±1.89	1.5±1.04	2.7±2.57	6.6±1.44	1.5±0.13	2.9±0.86	2.4±0.92	<0.50	4.4±1.19	not available	not available	not available	53.66	4.89	35.36	18.3	1.93224	0.532609	0.105769	0.352941	not available	12.1±2.50	4.4±1.02	38.8±10.51	118±21.30	9.9±2.49	33.2±4.96	25.8±3.56	7.1±2.17
2	Campos, Abrantes et al. (2019)	Ermida area, Aveiro district, North-central Portugal, July 26, 2010	Forest wildfire	Moderate	Humic Cambisols	Ermida_BP_4MAF_soil	< 2 cm mineral soil		1609	Pine (BP)	Forest	4 months (4MAF)	15	not available	1.1±0.18	<0.50	0.76±0.01	9.3±2.40	1.1±0.22	9.8±2.41	8.6±1.89	1.5±1.04	2.7±2.57	6.6±1.44	1.5±0.13	2.9±0.86	2.4±0.92	<0.50	4.4±1.19	not available	not available	not available	53.66	4.89	35.36	18.3	1.93224	0.532609	0.105769	0.352941	not available	2.6±0.81	<0.50	7.1±2.06	29.4±4.09	3.6±1.52	15.0±4.78	13.5±4.11	3.0±0.85
2	Campos, Abrantes et al. (2019)	Ermida area, Aveiro district, North-central Portugal, July 26, 2010	Forest wildfire	Moderate	Humic Cambisols	Ermida_BP_4MAF_ash	Ash		1609	Pine (BP)	Forest	4 months (4MAF)	15	not available	1.1±0.18	<0.50	0.76±0.01	9.3±2.40	1.1±0.22	9.8±2.41	8.6±1.89	1.5±1.04	2.7±2.57	6.6±1.44	1.5±0.13	2.9±0.86	2.4±0.92	<0.50	4.4±1.19	not available	not available	not available	53.66	4.89	35.36	18.3	1.93224	0.532609	0.105769	0.352941	not available	17.9±3.52	15.3±5.36	65.4±27.0	123±46.12	11.6±5.45	36.6±17.86	30.0±14.22	7.7±2.18
2	Campos, Abrantes et al. (2019)	Ermida area, Aveiro district, North-central Portugal, July 26, 2010	Forest wildfire	Moderate	Humic Cambisols	Ermida_BE_8MAF_soil	< 2 cm mineral soil		1609	Eucalypt (BE)	Forest	8 months (8MAF)	15	not available	0.70±0.02	<0.50	1.1±0.10	11.0±3.52	0.73±0.26	8.7±2.71	6.9±3.11	0.87±0.31	1.7±0.26	3.8±1.12	0.70±0.02	1.9±0.36	0.57±0.04	<0.50	0.68±0.09	not available	not available	not available	40.35	3.06	32.2	8.15	3.95092	0.557692	0.0622336	0.456	not available	1.0±0.10	<0.50	2.9±1.28	8.4±2.43	1.0±0.33	4.6±0.33	3.7±0.40	0.88±0.20
2	Campos, Abrantes et al. (2019)	Ermida area, Aveiro district, North-central Portugal, July 26, 2010	Forest wildfire	Moderate	Humic Cambisols	Ermida_BE_8MAF_ash	Ash		1609	Eucalypt (BE)	Forest	8 months (8MAF)	15	not available	0.70±0.02	<0.50	1.1±0.10	11.0±3.52	0.73±0.26	8.7±2.71	6.9±3.11	0.87±0.31	1.7±0.26	3.8±1.12	0.70±0.02	1.9±0.36	0.57±0.04	<0.50	0.68±0.09	not available	not available	not available	40.35	3.06	32.2	8.15	3.95092	0.557692	0.0622336	0.456	not available	8.8±2.30	2.4±0.18	24.1±2.97	122±6.06	14.9±1.33	18.4±2.89	19.8±4.86	2.9±0.44
2	Campos, Abrantes et al. (2019)	Ermida area, Aveiro district, North-central Portugal, July 26, 2010	Forest wildfire	Moderate	Humic Cambisols	Ermida_BP_8MAF_soil	< 2 cm mineral soil		1609	Pine (BP)	Forest	8 months (8MAF)	15	not available	0.70±0.02	<0.50	1.1±0.10	11.0±3.52	0.73±0.26	8.7±2.71	6.9±3.11	0.87±0.31	1.7±0.26	3.8±1.12	0.70±0.02	1.9±0.36	0.57±0.04	<0.50	0.68±0.09	not available	not available	not available	40.35	3.06	32.2	8.15	3.95092	0.557692	0.0622336	0.456	not available	1.5±0.01	<0.50	2.6±0.55	11.9±3.22	2.3±0.35	8.8±1.56	6.9±2.49	1.6±0.68
2	Campos, Abrantes et al. (2019)	Ermida area, Aveiro district, North-central Portugal, July 26, 2010	Forest wildfire	Moderate	Humic Cambisols	Ermida_BP_8MAF_ash	Ash		1609	Pine (BP)	Forest	8 months (8MAF)	15	not available	0.70±0.02	<0.50	1.1±0.10	11.0±3.52	0.73±0.26	8.7±2.71	6.9±3.11	0.87±0.31	1.7±0.26	3.8±1.12	0.70±0.02	1.9±0.36	0.57±0.04	<0.50	0.68±0.09	not available	not available	not available	40.35	3.06	32.2	8.15	3.95092	0.557692	0.0622336	0.456	not available	14.8±1.90	3.0±0.78	39.9±11.76	107±13.37	14.6±1.28	24.4±4.32	26.3±4.87	5.5±1.26
2	Campos, Abrantes et al. (2019)	Ermida area, Aveiro district, North-central Portugal, July 26, 2010	Forest wildfire	Moderate	Humic Cambisols	Ermida_BE_15MAF_soil	< 2 cm mineral soil		1609	Eucalypt (BE)	Forest	15 months (15MAF)	15	not available	0.65±0.02	<0.50	0.96±0.19	8.8±1.99	<0.30	8.5±1.50	5.7±0.66	1.5±0.63	2.5±1.01	4.5±0.71	2.0±0.72	1.4±0.24	2.5±0.77	<0.50	3.0±0.14	not available	not available	not available	43.31	3.08	29.41	13.9	2.11583	0.598592	not available	0.454545	not available	1.0±0.17	<0.50	3.4±1.54	13.3±4.47	1.3±0.33	7.8±2.70	6.1±2.21	1.9±1.40
2	Campos, Abrantes et al. (2019)	Ermida area, Aveiro district, North-central Portugal, July 26, 2010	Forest wildfire	Moderate	Humic Cambisols	Ermida_BE_15MAF_ash	Ash		1609	Eucalypt (BE)	Forest	15 months (15MAF)	15	not available	0.65±0.02	<0.50	0.96±0.19	8.8±1.99	<0.30	8.5±1.50	5.7±0.66	1.5±0.63	2.5±1.01	4.5±0.71	2.0±0.72	1.4±0.24	2.5±0.77	<0.50	3.0±0.14	not available	not available	not available	43.31	3.08	29.41	13.9	2.11583	0.598592	not available	0.454545	not available	11.2±4.36	6.4±1.39	29.4±7.29	107±10.68	9.4±2.11	32.2±6.01	27.8±5.77	8.9±0.98
2	Campos, Abrantes et al. (2019)	Ermida area, Aveiro district, North-central Portugal, July 26, 2010	Forest wildfire	Moderate	Humic Cambisols	Ermida_BP_15MAF_soil	< 2 cm mineral soil		1609	Pine (BP)	Forest	15 months (15MAF)	15	not available	0.65±0.02	<0.50	0.96±0.19	8.8±1.99	<0.30	8.5±1.50	5.7±0.66	1.5±0.63	2.5±1.01	4.5±0.71	2.0±0.72	1.4±0.24	2.5±0.77	<0.50	3.0±0.14	not available	not available	not available	43.31	3.08	29.41	13.9	2.11583	0.598592	not available	0.454545	not available	1.6±0.52	0.61±0.10	4.8±1.51	28.1±8.28	2.6±1.21	12.5±4.03	10.7±4.71	2.8±0.87
2	Campos, Abrantes et al. (2019)	Ermida area, Aveiro district, North-central Portugal, July 26, 2010	Forest wildfire	Moderate	Humic Cambisols	Ermida_BP_15MAF_ash	Ash		1609	Pine (BP)	Forest	15 months (15MAF)	15	not available	0.65±0.02	<0.50	0.96±0.19	8.8±1.99	<0.30	8.5±1.50	5.7±0.66	1.5±0.63	2.5±1.01	4.5±0.71	2.0±0.72	1.4±0.24	2.5±0.77	<0.50	3.0±0.14	not available	not available	not available	43.31	3.08	29.41	13.9	2.11583	0.598592	not available	0.454545	not available	9.2±4.22	10.8±1.19	23.9±4.89	113±36.93	9.3±3.93	35.8±10.75	30.5±7.37	6.6±0.95
3	Chen, Chow et al. (2018)	California, 2013	Rim Fire	Sever		Site 1_W_Ash	Ash	White-Ash		Ponderosa pine forest	Forest	46 days	16	178.735±37.45	2.975±0.69	2.36±1.7	6.87±1.43	27.55±9.18	2.965±1.33	5.36±4.06	4.23±3.63	1.28±1.07	4.92±5.0	3.45±3.12	1.52±1.00	1.26±1.1	0.92±0.91	0.15±0.24	2.615±2.03	not available	not available	not available	247 ± 58	2.61263	240.695	9.915	24.2758	0.558916	0.0971653	0.260255	641.01±375.8	7.81±1.3	10.08±5.21	23.19±8.1	130.41±51.96	9.84±1.91	16.51±4.49	10.59±3.4	1.55±0.26
3	Chen, Chow et al. (2018)	California, 2013	Rim Fire	Moderate		Site 1_B_Ash	Ash	Black-ash		Ponderosa pine forest	Forest	46 days	16	178.735±37.45	2.975±0.69	2.36±1.7	6.87±1.43	27.55±9.18	2.965±1.33	5.36±4.06	4.23±3.63	1.28±1.07	4.92±5.0	3.45±3.12	1.52±1.00	1.26±1.1	0.92±0.91	0.15±0.24	2.615±2.03	not available	not available	not available	247 ± 58	2.61263	240.695	9.915	24.2758	0.558916	0.0971653	0.260255	329.48±256.25	19.64±4.5	16.88±3.32	56.2±10.3	226.48±11.2	31.03±5.91	37.17±4.26	27.65±2.06	4.84±0.31
3	Chen, Chow et al. (2018)	California, 2013	Rim Fire	Sever		Site 2_W_Ash	Ash	White-Ash		Mixed conifer forest	Forest	46 days	16	178.735±37.45	2.975±0.69	2.36±1.7	6.87±1.43	27.55±9.18	2.965±1.33	5.36±4.06	4.23±3.63	1.28±1.07	4.92±5.0	3.45±3.12	1.52±1.00	1.26±1.1	0.92±0.91	0.15±0.24	2.615±2.03	not available	not available	not available	247 ± 58	2.61263	240.695	9.915	24.2758	0.558916	0.0971653	0.260255	220.36±184.34	3.82±0.67	3.56±0.55	11.48±0.32	80.53±1.38	6.23±0.6	9.11±0.66	5.72±0.43	1.04±0.09
3	Chen, Chow et al. (2018)	California, 2013	Rim Fire	Moderate		Site 2_B_Ash	Ash	Black-ash		Mixed conifer forest	Forest	46 days	16	178.735±37.45	2.975±0.69	2.36±1.7	6.87±1.43	27.55±9.18	2.965±1.33	5.36±4.06	4.23±3.63	1.28±1.07	4.92±5.0	3.45±3.12	1.52±1.00	1.26±1.1	0.92±0.91	0.15±0.24	2.615±2.03	not available	not available	not available	247 ± 58	2.61263	240.695	9.915	24.2758	0.558916	0.0971653	0.260255	368.63±110.68	15.85±1.68	10.23±0.93	33.65±2.83	173.13±30.23	20.19±4.87	27.04±6.81	17.35±3.44	3.6±1.02
3	Chen, Chow et al. (2018)	California, 2013	Rim Fire	Sever		Site 3_W_Ash	Ash	White-Ash		Mixed conifer forest	Forest	46 days	16	178.735±37.45	2.975±0.69	2.36±1.7	6.87±1.43	27.55±9.18	2.965±1.33	5.36±4.06	4.23±3.63	1.28±1.07	4.92±5.0	3.45±3.12	1.52±1.00	1.26±1.1	0.92±0.91	0.15±0.24	2.615±2.03	not available	not available	not available	247 ± 58	2.61263	240.695	9.915	24.2758	0.558916	0.0971653	0.260255	282.83±95.52	8.33±2.35	5.59±0.6	15.95±1.57	105±19.87	9.32±2.24	13.1±3.09	8.09±1.8	1.37±0.34
3	Chen, Chow et al. (2018)	California, 2013	Rim Fire	Moderate		Site 3_B_Ash	Ash	Black-ash		Mixed conifer forest	Forest	46 days	16	178.735±37.45	2.975±0.69	2.36±1.7	6.87±1.43	27.55±9.18	2.965±1.33	5.36±4.06	4.23±3.63	1.28±1.07	4.92±5.0	3.45±3.12	1.52±1.00	1.26±1.1	0.92±0.91	0.15±0.24	2.615±2.03	not available	not available	not available	247 ± 58	2.61263	240.695	9.915	24.2758	0.558916	0.0971653	0.260255	351.22±32.96	24.82±12.31	14.94±4.81	49.69±15.38	211.87±60.85	25.22±6.3	34.21±14.43	26.36±12.83	6.15±3.34
3	Chen, Chow et al. (2018)	California, 2013	Rim Fire	Sever		Site 4_W_Ash	Ash	White-Ash		Mixed oak woodland	Forest	46 days	16	178.735±37.45	2.975±0.69	2.36±1.7	6.87±1.43	27.55±9.18	2.965±1.33	5.36±4.06	4.23±3.63	1.28±1.07	4.92±5.0	3.45±3.12	1.52±1.00	1.26±1.1	0.92±0.91	0.15±0.24	2.615±2.03	not available	not available	not available	247 ± 58	2.61263	240.695	9.915	24.2758	0.558916	0.0971653	0.260255	428.85±269.95	11.99±9.54	6.72±4.48	20.63±14.31	127.83±71.84	11.22±9.45	17.33±7.59	11.16±5.62	2.13±1
3	Chen, Chow et al. (2018)	California, 2013	Rim Fire	Moderate		Site 4_B_Ash	Ash	Black-ash		Mixed oak woodland	Forest	46 days	16	178.735±37.45	2.975±0.69	2.36±1.7	6.87±1.43	27.55±9.18	2.965±1.33	5.36±4.06	4.23±3.63	1.28±1.07	4.92±5.0	3.45±3.12	1.52±1.00	1.26±1.1	0.92±0.91	0.15±0.24	2.615±2.03	not available	not available	not available	247 ± 58	2.61263	240.695	9.915	24.2758	0.558916	0.0971653	0.260255	332.84±95.19	40.88±15.48	23.83±7.95	80.86±40.2	369.63±156.8	49.32±33.21	57.93±32.51	43.85±26.1	11.7±9.16
3	Chen, Chow et al. (2018)	California, 2013	Rim Fire	Sever		Site 5_W_Ash	Ash	White-Ash		Chaparral	Forest	46 days	16	178.735±37.45	2.975±0.69	2.36±1.7	6.87±1.43	27.55±9.18	2.965±1.33	5.36±4.06	4.23±3.63	1.28±1.07	4.92±5.0	3.45±3.12	1.52±1.00	1.26±1.1	0.92±0.91	0.15±0.24	2.615±2.03	not available	not available	not available	247 ± 58	2.61263	240.695	9.915	24.2758	0.558916	0.0971653	0.260255	147.42±219.73	4.44±4.26	3.5±2.05	11.72±2.73	74.61±9.37	6.79±1.77	7.39±1.81	4.18±1.24	0.54±0.31
3	Chen, Chow et al. (2018)	California, 2013	Rim Fire	Moderate		Site 5_B_Ash	Ash	Black-ash		Chaparral	Forest	46 days	16	178.735±37.45	2.975±0.69	2.36±1.7	6.87±1.43	27.55±9.18	2.965±1.33	5.36±4.06	4.23±3.63	1.28±1.07	4.92±5.0	3.45±3.12	1.52±1.00	1.26±1.1	0.92±0.91	0.15±0.24	2.615±2.03	not available	not available	not available	247 ± 58	2.61263	240.695	9.915	24.2758	0.558916	0.0971653	0.260255	619.55±407.48	26.42±7.15	19.16±3.23	58.21±13.77	276.97±66.35	29.21±8.84	43±18.88	35.26±18.72	7.1±4.35
4	Simon, Choi et al. (2016)	Ulsan City, South Korea, March 9, 2013	Forest wildfire	Sever	A forested hillside in a semi-rural area	T1	Burned soil	0-5 cm		41-50 years old pine trees	Forest	19 days	16	43.3	1.5	6	9.5	47.2	7.8	50.9	34.1	15.8	25.3	34.6	6.9	12.1	19.8	2.5	17.2	not available	not available	not available	334.5	22.7715	241.4	93.1	2.59291	0.598824	0.141818	0.535135	69.1	6	3.3	10.8	51.1	7.4	36	27.8	11.8
4	Simon, Choi et al. (2016)	Ulsan City, South Korea, March 9, 2013	Forest wildfire	Sever	A forested hillside in a semi-rural area	T1	Ash			41-51 years old pine trees	Forest	19 days	16	43.3	1.5	6	9.5	47.2	7.8	50.9	34.1	15.8	25.3	34.6	6.9	12.1	19.8	2.5	17.2	not available	not available	not available	334.5	22.7715	241.4	93.1	2.59291	0.598824	0.141818	0.535135	8400	327.7	129.1	423.7	916.2	162.3	216.5	176.6	68.8
4	Simon, Choi et al. (2016)	Ulsan City, South Korea, March 9, 2013	Forest wildfire	Sever	A forested hillside in a semi-rural area	T2	Burned soil	0-5 cm		41-52 years old pine trees	Forest	111 days	16	8.3	not detected	2.3	4.2	25.6	4.4	20.2	17.3	6	14.4	10.4	4.3	4.4	5	not detected	4.3	not available	not available	not available	131.2	7.2159	102.7	28.4	3.6162	0.538667	0.146667	0.537634	28.4	2	2.4	6.6	32.8	5.8	22.3	20.6	8.4
4	Simon, Choi et al. (2016)	Ulsan City, South Korea, March 9, 2013	Forest wildfire	Sever	A forested hillside in a semi-rural area	T2	Ash			41-53 years old pine trees	Forest	111 days	16	8.3	not detected	2.3	4.2	25.6	4.4	20.2	17.3	6	14.4	10.4	4.3	4.4	5	not detected	4.3	not available	not available	not available	131.2	7.2159	102.7	28.4	3.6162	0.538667	0.146667	0.537634	2134.6	55.6	35.1	140.2	557.1	63.6	170	113.3	47.7
4	Simon, Choi et al. (2016)	Ulsan City, South Korea, March 9, 2013	Forest wildfire	Sever	A forested hillside in a semi-rural area	T3	Burned soil	0-5 cm		41-54 years old pine trees	Forest	209 days	16	4.2	0.4	1.4	not detected	17.4	2.5	18.5	16	7.2	17.3	13.6	6	5.5	7.4	not detected	6.1	not available	not available	not available	123.4	9.1199	84.9	38.6	2.19948	0.536232	0.125628	0.548148	14.7	0.6	1.2	not detected	18.4	1.5	10	7.8	2.5
4	Simon, Choi et al. (2016)	Ulsan City, South Korea, March 9, 2013	Forest wildfire	Sever	A forested hillside in a semi-rural area	T3	Ash			41-55 years old pine trees	Forest	209 days	16	4.2	0.4	1.4	not detected	17.4	2.5	18.5	16	7.2	17.3	13.6	6	5.5	7.4	not detected	6.1	not available	not available	not available	123.4	9.1199	84.9	38.6	2.19948	0.536232	0.125628	0.548148	975.1	38.8	22	73.8	366.7	42.3	160.7	109.6	47
4	Simon, Choi et al. (2016)	Ulsan City, South Korea, March 9, 2013	Forest wildfire	Sever	A forested hillside in a semi-rural area	T4	Burned soil	0-5 cm		41-56 years old pine trees	Forest	311 days	16	16.5	0.5	2.7	4.5	21	12.2	13.7	11.2	5.1	8.1	10.1	1.4	3.8	5	not detected	4.5	not available	not available	not available	120.2	6.2331	95.5	24.8	3.85081	0.550201	0.36747	0.526316	50.9	1.5	3.3	7.3	37	4.8	22.7	16	7.3
4	Simon, Choi et al. (2016)	Ulsan City, South Korea, March 9, 2013	Forest wildfire	Sever	A forested hillside in a semi-rural area	T4	Ash			41-57 years old pine trees	Forest	311 days	16	16.5	0.5	2.7	4.5	21	12.2	13.7	11.2	5.1	8.1	10.1	1.4	3.8	5	not detected	4.5	not available	not available	not available	120.2	6.2331	95.5	24.8	3.85081	0.550201	0.36747	0.526316	586.6	19.9	15.6	57	306.3	37.6	132.2	94.7	38
4	Simon, Choi et al. (2016)	Ulsan City, South Korea, March 9, 2013	Forest wildfire	Sever	A forested hillside in a semi-rural area	T5	Burned soil	0-5 cm		41-58 years old pine trees	Forest	492 days	16	13.6	0.5	1.5	not detected	15.4	1.7	16.8	12.8	7	17.3	14.1	2.4	5.5	7.6	not detected	6.6	not available	not available	not available	122.7	8.8366	86.6	36.2	2.39227	0.567568	0.0994152	0.535211	5.9	not detected	0.8	not detected	8.1	1.3	6.1	5.7	2.1
4	Simon, Choi et al. (2016)	Ulsan City, South Korea, March 9, 2013	Forest wildfire	Sever	A forested hillside in a semi-rural area	T5	Ash			41-59 years old pine trees	Forest	492 days	16	13.6	0.5	1.5	not detected	15.4	1.7	16.8	12.8	7	17.3	14.1	2.4	5.5	7.6	not detected	6.6	not available	not available	not available	122.7	8.8366	86.6	36.2	2.39227	0.567568	0.0994152	0.535211	451.8	17.7	11.4	31.1	216.7	27.8	127.4	91.9	33.1
5	Kim, Choi et al. (2011)	Gosung, Gangwon, South Korea, April 2000	Forest wildfire	Sever	In mountains far from industrial or residential areas	Site A	Burned soil	0-5 cm	The monsoon season occurred 2-3 months after the fire		Forest	1 month	10	4.91	0.17	1.31	4.77	7.14	1.17	5.11	3.55	2.9	4.72	5.16	3.92	1.63	1.22	0.66	1.03	not available	not available	not available	49.4	3.68906	35.75	13.62	2.62482	0.590069	0.140794	0.542222	395	12.1	5.88	105	169	142	54.8	27.1	8.39
5	Kim, Choi et al. (2011)	Gosung, Gangwon, South Korea, April 2000	Forest wildfire	Sever	In mountains far from industrial or residential areas	Site A	Burned soil	0-5 cm	The monsoon season occurred 2-3 months after the fire		Forest	5 months	10	4.91	0.17	1.31	4.77	7.14	1.17	5.11	3.55	2.9	4.72	5.16	3.92	1.63	1.22	0.66	1.03	not available	not available	not available	49.4	3.68906	35.75	13.62	2.62482	0.590069	0.140794	0.542222	17.1	4.27	0.78	7.11	44.9	12.5	22.9	17.7	6.16
5	Kim, Choi et al. (2011)	Gosung, Gangwon, South Korea, April 2000	Forest wildfire	Sever	In mountains far from industrial or residential areas	Site A	Burned soil	0-5 cm	The monsoon season occurred 2-3 months after the fire		Forest	9 months	10	4.91	0.17	1.31	4.77	7.14	1.17	5.11	3.55	2.9	4.72	5.16	3.92	1.63	1.22	0.66	1.03	not available	not available	not available	49.4	3.68906	35.75	13.62	2.62482	0.590069	0.140794	0.542222	14	43.1	17.7	21.8	175	29.4	53.9	33.8	12.9
5	Kim, Choi et al. (2011)	Gangneung, Gangwon, South Korea, April 2000	Forest wildfire	Sever	In mountains far from industrial or residential areas	Site B	Burned soil	0-5 cm	The monsoon season occurred 2-3 months after the fire		Forest	1 month	10	4.91	0.17	1.31	4.77	7.14	1.17	5.11	3.55	2.9	4.72	5.16	3.92	1.63	1.22	0.66	1.03	not available	not available	not available	49.4	3.68906	35.75	13.62	2.62482	0.590069	0.140794	0.542222	420	34.7	8.35	77.4	231	138	71.8	43.4	17.4
5	Kim, Choi et al. (2011)	Gangneung, Gangwon, South Korea, April 2000	Forest wildfire	Sever	In mountains far from industrial or residential areas	Site B	Burned soil	0-5 cm	The monsoon season occurred 2-3 months after the fire		Forest	5 months	10	4.91	0.17	1.31	4.77	7.14	1.17	5.11	3.55	2.9	4.72	5.16	3.92	1.63	1.22	0.66	1.03	not available	not available	not available	49.4	3.68906	35.75	13.62	2.62482	0.590069	0.140794	0.542222	3.21	0.4	not detected	5.09	50.6	16.9	28.4	17.6	9.37
5	Kim, Choi et al. (2011)	Gangneung, Gangwon, South Korea, April 2000	Forest wildfire	Sever	In mountains far from industrial or residential areas	Site B	Burned soil	0-5 cm	The monsoon season occurred 2-3 months after the fire		Forest	9 months	10	4.91	0.17	1.31	4.77	7.14	1.17	5.11	3.55	2.9	4.72	5.16	3.92	1.63	1.22	0.66	1.03	not available	not available	not available	49.4	3.68906	35.75	13.62	2.62482	0.590069	0.140794	0.542222	63.5	not detected	8.96	14.4	40.7	4.61	19	11.6	9.79
5	Kim, Choi et al. (2011)	Samchock, Gangwon, South Korea, April 2000	Forest wildfire	Sever	In mountains far from industrial or residential areas	Site C	Burned soil	0-5 cm	The monsoon season occurred 2-3 months after the fire		Forest	1 month	10	4.91	0.17	1.31	4.77	7.14	1.17	5.11	3.55	2.9	4.72	5.16	3.92	1.63	1.22	0.66	1.03	not available	not available	not available	49.4	3.68906	35.75	13.62	2.62482	0.590069	0.140794	0.542222	268	126	31.5	100	299	202	234	116	61.3
5	Kim, Choi et al. (2011)	Samchock, Gangwon, South Korea, April 2000	Forest wildfire	Sever	In mountains far from industrial or residential areas	Site C	Burned soil	0-5 cm	The monsoon season occurred 2-3 months after the fire		Forest	5 months	10	4.91	0.17	1.31	4.77	7.14	1.17	5.11	3.55	2.9	4.72	5.16	3.92	1.63	1.22	0.66	1.03	not available	not available	not available	49.4	3.68906	35.75	13.62	2.62482	0.590069	0.140794	0.542222	39.1	3.82	1.88	25.9	105	39.6	41.6	20.3	9.95
5	Kim, Choi et al. (2011)	Samchock, Gangwon, South Korea, April 2000	Forest wildfire	Sever	In mountains far from industrial or residential areas	Site C	Burned soil	0-5 cm	The monsoon season occurred 2-3 months after the fire		Forest	9 months	10	4.91	0.17	1.31	4.77	7.14	1.17	5.11	3.55	2.9	4.72	5.16	3.92	1.63	1.22	0.66	1.03	not available	not available	not available	49.4	3.68906	35.75	13.62	2.62482	0.590069	0.140794	0.542222	1.18	3.94	not detected	9.1	48.5	16.4	25	17	12
5	Kim, Choi et al. (2011)	Donghae, Gangwon, South Korea, December 2000	Forest wildfire	Mild	In mountains far from industrial or residential areas	Site D	Burned soil	0-5 cm	The monsoon season occurred 2-3 months after the fire		Forest	1 month	10	4.91	0.17	1.31	4.77	7.14	1.17	5.11	3.55	2.9	4.72	5.16	3.92	1.63	1.22	0.66	1.03	not available	not available	not available	49.4	3.68906	35.75	13.62	2.62482	0.590069	0.140794	0.542222	136	99	41.7	29.5	143	35.3	40.4	35.3	16.8
5	Kim, Choi et al. (2011)	Donghae, Gangwon, South Korea, December 2000	Forest wildfire	Mild	In mountains far from industrial or residential areas	Site D	Ash		The monsoon season occurred 2-3 months after the fire		Forest	1 month	10	4.91	0.17	1.31	4.77	7.14	1.17	5.11	3.55	2.9	4.72	5.16	3.92	1.63	1.22	0.66	1.03	not available	not available	not available	49.4	3.68906	35.75	13.62	2.62482	0.590069	0.140794	0.542222	150	79	36.9	42	182	47.1	47.2	40.8	24
5	Kim, Choi et al. (2011)	Pohang, South Korea, March 2001	Forest wildfire	Mild	In mountains far from industrial or residential areas	Site E	Burned soil	0-5 cm	The monsoon season occurred 2-3 months after the fire		Forest	1 month	10	4.91	0.17	1.31	4.77	7.14	1.17	5.11	3.55	2.9	4.72	5.16	3.92	1.63	1.22	0.66	1.03	not available	not available	not available	49.4	3.68906	35.75	13.62	2.62482	0.590069	0.140794	0.542222	101	not detected	not detected	11.7	26.9	6.09	10.5	9.33	8.3
5	Kim, Choi et al. (2011)	Pohang, South Korea, March 2001	Forest wildfire	Mild	In mountains far from industrial or residential areas	Site E	Ash		The monsoon season occurred 2-3 months after the fire		Forest	1 month	10	4.91	0.17	1.31	4.77	7.14	1.17	5.11	3.55	2.9	4.72	5.16	3.92	1.63	1.22	0.66	1.03	not available	not available	not available	49.4	3.68906	35.75	13.62	2.62482	0.590069	0.140794	0.542222	276	33	not detected	21.1	104	30.4	32.6	25.2	20.7
6	Dymov, Gabov et al. (2017)	Komi Republic Russia		/		Unburnt soil (1L)		Balk soil (BS)	500-600	Lichen pine, 10P	Forest	Unburned	14	not detected	not available	not detected	41±17	27±13	1.2±0.6	not detected	not detected	not detected	not detected	not detected	not detected	not detected	not available	not detected	29±13	not available	not available	not available	98.2	2.98	69.2	29	2.38621	not available	0.0425532	not available	not detected	not available	not detected	41±17	27±13	1.2±0.6	not detected	not detected	not detected
6	Dymov, Gabov et al. (2017)	Komi Republic Russia		/		Unburnt soil (1L)		Free particle OM (FPOM)	500-600	Lichen pine, 10P	Forest	Unburned	14	410±210	not available	11±4	580±150	140±30	12±6	130±50	120±60	8±4	130±40	53±22	14±7	21±11	not available	9±4	270±60	not available	not available	not available	1908	67.31	1541	367	4.19891	0.52	0.0789474	not available	410±210	not available	11±4	580±150	140±30	12±6	130±50	120±60	8±4
6	Dymov, Gabov et al. (2017)	Komi Republic Russia		/		Unburnt soil (1L)		Heavy fraction (HF)	500-600	Lichen pine, 10P	Forest	Unburned	14	not detected	not available	not detected	23±9	7±4	not detected	not detected	not detected	not detected	not detected	not detected	not detected	not detected	not available	not detected	not detected	not available	not available	not available	30	0.03	30	not available	not available	not available	not available	not available	not detected	not available	not detected	23±9	7±4	not detected	not detected	not detected	not detected
6	Dymov, Gabov et al. (2017)	Komi Republic Russia	Forest wildfire	Sever		Burnt soil (2L)		Balk soil (BS)	500-600	Lichen pine, 10P	Forest	2 years	14	not detected	not available	not detected	41±17	27±13	1.2±0.6	not detected	not detected	not detected	not detected	not detected	not detected	not detected	not available	not detected	29±13	not available	not available	not available	98.2	2.98	69.2	29	2.38621	not available	0.0425532	not available	63±30	not available	not detected	84±22	43±22	2.1±1.1	not detected	not detected	not detected
6	Dymov, Gabov et al. (2017)	Komi Republic Russia	Forest wildfire	Sever		Burnt soil (2L)		Free particle OM (FPOM)	500-600	Lichen pine, 10P	Forest	2 years	14	410±210	not available	11±4	580±150	140±30	12±6	130±50	120±60	8±4	130±40	53±22	14±7	21±11	not available	9±4	270±60	not available	not available	not available	1908	67.31	1541	367	4.19891	0.52	0.0789474	not available	740±260	not available	33±13	1210±220	610±140	39±9	220±80	150±70	6±3
6	Dymov, Gabov et al. (2017)	Komi Republic Russia	Forest wildfire	Sever		Burnt soil (2L)		Occluded particulate OM (OPOM)	500-600	Lichen pine, 10P	Forest	2 years	14	not available	not available	not available	not available	not available	not available	not available	not available	not available	not available	not available	not available	not available	not available	not available	not available	not available	not available	not available	not available	not available	not available	not available	not available	not available	not available	not available	1170±190	not available	51±20	1700±300	900±200	44±11	100±40	70±30	9±4
6	Dymov, Gabov et al. (2017)	Komi Republic Russia	Forest wildfire	Sever		Burnt soil (2L)		Heavy fraction (HF)	500-600	Lichen pine, 10P	Forest	2 years	14	not detected	not available	not detected	23±9	7±4	not detected	not detected	not detected	not detected	not detected	not detected	not detected	not detected	not available	not detected	not detected	not available	not available	not available	30	0.03	30	not available	not available	not available	not available	not available	23±11	not available	not detected	50±20	27±13	1.7±0.9	not detected	not detected	not detected
6	Dymov, Gabov et al. (2017)	Komi Republic Russia	Forest wildfire	Moderate		Burnt soil (3L)		Balk soil (BS)	500-600	Lichen pine, 10P	Forest	10 years	14	not detected	not available	not detected	41±17	27±13	1.2±0.6	not detected	not detected	not detected	not detected	not detected	not detected	not detected	not available	not detected	29±13	not available	not available	not available	98.2	2.98	69.2	29	2.38621	not available	0.0425532	not available	150±80	not available	not detected	170±40	121±27	6±3	23±11	not detected	not detected
6	Dymov, Gabov et al. (2017)	Komi Republic Russia	Forest wildfire	Moderate		Burnt soil (3L)		Free particle OM (FPOM)	500-600	Lichen pine, 10P	Forest	10 years	14	410±210	not available	11±4	580±150	140±30	12±6	130±50	120±60	8±4	130±40	53±22	14±7	21±11	not available	9±4	270±60	not available	not available	not available	1908	67.31	1541	367	4.19891	0.52	0.0789474	not available	450±220	not available	18±7	660±170	390±80	25±6	58±27	30±14	7±3
6	Dymov, Gabov et al. (2017)	Komi Republic Russia	Forest wildfire	Moderate		Burnt soil (3L)		Occluded particulate OM (OPOM)	500-600	Lichen pine, 10P	Forest	10 years	14	not available	not available	not available	not available	not available	not available	not available	not available	not available	not available	not available	not available	not available	not available	not available	not available	not available	not available	not available	not available	not available	not available	not available	not available	not available	not available	not available	470±230	not available	18±7	630±160	410±90	40±10	100±40	70±30	not detected
6	Dymov, Gabov et al. (2017)	Komi Republic Russia	Forest wildfire	Moderate		Burnt soil (3L)		Heavy fraction (HF)	500-600	Lichen pine, 10P	Forest	10 years	14	not detected	not available	not detected	23±9	7±4	not detected	not detected	not detected	not detected	not detected	not detected	not detected	not detected	not available	not detected	not detected	not available	not available	not available	30	0.03	30	not available	not available	not available	not available	not available	50±25	not available	not detected	110±30	47±23	2.3±1.2	not detected	not detected	not detected
6	Dymov, Gabov et al. (2017)	Komi Republic Russia	Forest wildfire	Moderate		Burnt soil (4L)		Balk soil (BS)	500-600	Lichen pine, 10P	Forest	16 years	14	not detected	not available	not detected	41±17	27±13	1.2±0.6	not detected	not detected	not detected	not detected	not detected	not detected	not detected	not available	not detected	29±13	not available	not available	not available	98.2	2.98	69.2	29	2.38621	not available	0.0425532	not available	42±21	not available	not detected	54±21	34±17	1.0±0.5	not detected	not detected	not detected
6	Dymov, Gabov et al. (2017)	Komi Republic Russia	Forest wildfire	Moderate		Burnt soil (4L)		Free particle OM (FPOM)	500-600	Lichen pine, 10P	Forest	16 years	14	410±210	not available	11±4	580±150	140±30	12±6	130±50	120±60	8±4	130±40	53±22	14±7	21±11	not available	9±4	270±60	not available	not available	not available	1908	67.31	1541	367	4.19891	0.52	0.0789474	not available	410±210	not available	15±6	630±160	480±110	22±5	67±25	70±30	36±15
6	Dymov, Gabov et al. (2017)	Komi Republic Russia	Forest wildfire	Moderate		Burnt soil (4L)		Occluded particulate OM (OPOM)	500-600	Lichen pine, 10P	Forest	16 years	14	not available	not available	not available	not available	not available	not available	not available	not available	not available	not available	not available	not available	not available	not available	not available	not available	not available	not available	not available	not available	not available	not available	not available	not available	not available	not available	not available	400±200	not available	27±11	740±190	580±130	26±6	120±50	70±30	6±3
6	Dymov, Gabov et al. (2017)	Komi Republic Russia	Forest wildfire	Moderate		Burnt soil (4L)		Heavy fraction (HF)	500-600	Lichen pine, 10P	Forest	16 years	14	not detected	not available	not detected	23±9	7±4	not detected	not detected	not detected	not detected	not detected	not detected	not detected	not detected	not available	not detected	not detected	not available	not available	not available	30	0.03	30	not available	not available	not available	not available	not available	not detected	not available	not detected	36±14	16±8	not detected	not detected	not detected	not detected
7	Dymov and Gabov (2015)	Komi Republic Russia	Forest wildfire	Sever	Oligomictic sand of glaciofluvial origin	Burnt soil (2L)		Opyr/L (0-1 cm)	500-600	Lichen pine, 10P	Forest	2 years	15	43±18	not available	not detected	105±23	80±30	5.5±2.3	not detected	not detected	not detected	5.7±2.5	not detected	2.3±0.9	5.6±2.4	not detected	10±4	7±3	not available	not available	not available	264.1	16.87	239.2	24.9	9.60643	not available	0.0643275	not available	100±40	not available	not detected	2200±300	80±30	2.8±1.2	not detected	24±9	7.1±2.5
7	Dymov and Gabov (2015)	Komi Republic Russia	Forest wildfire	Sever	Oligomictic sand of glaciofluvial origin	Burnt soil (2L)		Qpyr/Epyr (1-6 cm)	500-600	Lichen pine, 10P	Forest	2 years	15	35±15	not available	13±4	108±24	113±20	5.0±2.1	not detected	not detected	not detected	3.2±1.4	not detected	not detected	2.8±1.2	not detected	10±4	not detected	not available	not available	not available	290	13.12	277.2	12.8	21.6562	not available	0.0423729	not available	not detected	not available	not detected	32±11	10±4	not detected	not detected	not detected	not detected
7	Dymov and Gabov (2015)	Komi Republic Russia	Forest wildfire	Sever	Oligomictic sand of glaciofluvial origin	Burnt soil (2L)		E (6-15 cm)	500-600	Lichen pine, 10P	Forest	2 years	15	not detected	not available	not detected	9±3	6.8±2.8	not detected	not detected	not detected	not detected	not detected	not detected	not detected	not detected	not detected	not detected	not detected	not available	not available	not available	15.8	0.02	15.8	not available	not available	not available	not available	not available	not detected	not available	not detected	16±5	9±4	not detected	not detected	not detected	not detected
7	Dymov and Gabov (2015)	Komi Republic Russia	Forest wildfire	Sever	Oligomictic sand of glaciofluvial origin	Burnt soil (2L)		BS (15-40 cm)	500-600	Lichen pine, 10P	Forest	2 years	15	not detected	not available	not detected	13±4	9±4	not detected	not detected	not detected	not detected	not detected	not detected	not detected	not detected	not detected	not detected	not detected	not available	not available	not available	22	0.02	22	not available	not available	not available	not available	not available	not detected	not available	not detected	not detected	not detected	not detected	not detected	not detected	not detected
7	Dymov and Gabov (2015)	Komi Republic Russia	Forest wildfire	Moderate	Oligomictic sand of glaciofluvial origin	Burnt soil (3L)		Opyr/L (0-1 cm)	500-600	Lichen pine, 10P	Forest	10 years	15	43±18	not available	not detected	105±23	80±30	5.5±2.3	not detected	not detected	not detected	5.7±2.5	not detected	2.3±0.9	5.6±2.4	not detected	10±4	7±3	not available	not available	not available	264.1	16.87	239.2	24.9	9.60643	not available	0.0643275	not available	80±40	not available	15±5	122±27	170±30	7.0±2.9	not detected	not detected	not detected
7	Dymov and Gabov (2015)	Komi Republic Russia	Forest wildfire	Moderate	Oligomictic sand of glaciofluvial origin	Burnt soil (3L)		Qpyr/Epyr (1-3 cm)	500-600	Lichen pine, 10P	Forest	10 years	15	35±15	not available	13±4	108±24	113±20	5.0±2.1	not detected	not detected	not detected	3.2±1.4	not detected	not detected	2.8±1.2	not detected	10±4	not detected	not available	not available	not available	290	13.12	277.2	12.8	21.6562	not available	0.0423729	not available	not detected	not available	not detected	19±6	29±12	1.3±0.6	not detected	not detected	not detected
7	Dymov and Gabov (2015)	Komi Republic Russia	Forest wildfire	Moderate	Oligomictic sand of glaciofluvial origin	Burnt soil (3L)		E (3-7 cm)	500-600	Lichen pine, 10P	Forest	10 years	15	not detected	not available	not detected	9±3	6.8±2.8	not detected	not detected	not detected	not detected	not detected	not detected	not detected	not detected	not detected	not detected	not detected	not available	not available	not available	15.8	0.02	15.8	not available	not available	not available	not available	not available	not detected	not available	not detected	16±5	9±4	not detected	not detected	not detected	not detected
7	Dymov and Gabov (2015)	Komi Republic Russia	Forest wildfire	Moderate	Oligomictic sand of glaciofluvial origin	Burnt soil (3L)		BS (6-20 cm)	500-600	Lichen pine, 10P	Forest	10 years	15	not detected	not available	not detected	13±4	9±4	not detected	not detected	not detected	not detected	not detected	not detected	not detected	not detected	not detected	not detected	not detected	not available	not available	not available	22	0.02	22	not available	not available	not available	not available	not available	not detected	not available	not detected	18±6	9±4	not detected	not detected	not detected	not detected
7	Dymov and Gabov (2015)	Komi Republic Russia	Forest wildfire	Moderate	Oligomictic sand of glaciofluvial origin	Burnt soil (4L)		Opyr/L (0-1 cm)	500-600	Lichen pine, 10P	Forest	16 years	15	43±18	not available	not detected	105±23	80±30	5.5±2.3	not detected	not detected	not detected	5.7±2.5	not detected	2.3±0.9	5.6±2.4	not detected	10±4	7±3	not available	not available	not available	264.1	16.87	239.2	24.9	9.60643	not available	0.0643275	not available	49±20	not available	17±6	300±70	310±60	16±7	24±9	not detected	not detected
7	Dymov and Gabov (2015)	Komi Republic Russia	Forest wildfire	Moderate	Oligomictic sand of glaciofluvial origin	Burnt soil (4L)		Qpyr/Epyr (1-3 cm)	500-600	Lichen pine, 10P	Forest	16 years	15	35±15	not available	13±4	108±24	113±20	5.0±2.1	not detected	not detected	not detected	3.2±1.4	not detected	not detected	2.8±1.2	not detected	10±4	not detected	not available	not available	not available	290	13.12	277.2	12.8	21.6562	not available	0.0423729	not available	not detected	not available	not detected	20±7	13±6	not detected	not detected	not detected	not detected
7	Dymov and Gabov (2015)	Komi Republic Russia	Forest wildfire	Moderate	Oligomictic sand of glaciofluvial origin	Burnt soil (4L)		E (3-8 cm)	500-600	Lichen pine, 10P	Forest	16 years	15	not detected	not available	not detected	9±3	6.8±2.8	not detected	not detected	not detected	not detected	not detected	not detected	not detected	not detected	not detected	not detected	not detected	not available	not available	not available	15.8	0.02	15.8	not available	not available	not available	not available	not available	not detected	not available	not detected	12±4	7.0±2.9	not detected	not detected	not detected	not detected
7	Dymov and Gabov (2015)	Komi Republic Russia	Forest wildfire	Moderate	Oligomictic sand of glaciofluvial origin	Burnt soil (4L)		BS (8-25 cm)	500-600	Lichen pine, 10P	Forest	16 years	15	not detected	not available	not detected	13±4	9±4	not detected	not detected	not detected	not detected	not detected	not detected	not detected	not detected	not detected	not detected	not detected	not available	not available	not available	22	0.02	22	not available	not available	not available	not available	not available	not detected	not available	not detected	11±4	8±3	not detected	not detected	not detected	not detected
8	Tsibart, Gennadiev et al. (2014)	Shatura District, Moscow, Russia, 2002, 2010, 2012			Peatlands overlying ancient alluvial deposits	Control pit 10	Histosols	He (0-5 cm)					12	not available	not available	not available	not available	not available	not available	not available	not available	not available	not available	not available	not available	not available	not available	not available	not available	not available	not available	not available	not available	not available	not available	not available	not available	not available	not available	not available	11	not available	not available	not detected	not detected	not detected	not detected	not detected	8.6
8	Tsibart, Gennadiev et al. (2014)	Shatura District, Moscow, Russia, 2002, 2010, 2012			Peatlands overlying ancient alluvial deposits	Control pit 10	Histosols	He (5-10 cm)					12	not available	not available	not available	not available	not available	not available	not available	not available	not available	not available	not available	not available	not available	not available	not available	not available	not available	not available	not available	not available	not available	not available	not available	not available	not available	not available	not available	29.1	not available	not available	not detected	36.1	3.4	not detected	not detected	11.6
8	Tsibart, Gennadiev et al. (2014)	Shatura District, Moscow, Russia, 2002, 2010, 2012			Peatlands overlying ancient alluvial deposits	Control pit 10	Histosols	He (10-15 cm)					12	not available	not available	not available	not available	not available	not available	not available	not available	not available	not available	not available	not available	not available	not available	not available	not available	not available	not available	not available	not available	not available	not available	not available	not available	not available	not available	not available	40.6	not available	not available	not detected	49.3	not detected	not detected	not detected	19.7
8	Tsibart, Gennadiev et al. (2014)	Shatura District, Moscow, Russia, 2002, 2010, 2012			Peatlands overlying ancient alluvial deposits	Control pit 10	Histosols	He (15-20 cm)					12	not available	not available	not available	not available	not available	not available	not available	not available	not available	not available	not available	not available	not available	not available	not available	not available	not available	not available	not available	not available	not available	not available	not available	not available	not available	not available	not available	34.7	not available	not available	not detected	38	not detected	not detected	not detected	9.6
8	Tsibart, Gennadiev et al. (2014)	Shatura District, Moscow, Russia, 2002, 2010, 2012			Peatlands overlying ancient alluvial deposits	Control pit 10	Histosols	Ha (20-30 cm)					12	not available	not available	not available	not available	not available	not available	not available	not available	not available	not available	not available	not available	not available	not available	not available	not available	not available	not available	not available	not available	not available	not available	not available	not available	not available	not available	not available	32.5	not available	not available	not detected	not detected	not detected	not detected	not detected	16.2
8	Tsibart, Gennadiev et al. (2014)	Shatura District, Moscow, Russia, 2002, 2010, 2012			Peatlands overlying ancient alluvial deposits	Control pit 10	Histosols	Ha (30-40 cm)					12	not available	not available	not available	not available	not available	not available	not available	not available	not available	not available	not available	not available	not available	not available	not available	not available	not available	not available	not available	not available	not available	not available	not available	not available	not available	not available	not available	45.9	not available	not available	not detected	not detected	not detected	not detected	not detected	12
8	Tsibart, Gennadiev et al. (2014)	Shatura District, Moscow, Russia, 2002, 2010, 2012			Peatlands overlying ancient alluvial deposits	Control pit 10	Histosols	Ha (40-50 cm)					12	not available	not available	not available	not available	not available	not available	not available	not available	not available	not available	not available	not available	not available	not available	not available	not available	not available	not available	not available	not available	not available	not available	not available	not available	not available	not available	not available	63.5	not available	not available	not detected	27.2	not detected	not detected	not detected	46.5
8	Tsibart, Gennadiev et al. (2014)	Shatura District, Moscow, Russia, 2002, 2010, 2012			Peatlands overlying ancient alluvial deposits	Control pit 1	Sod podzols	O (0-1 cm)					11	not available	not available	not available	not available	not available	not available	not available	not available	not available	not available	not available	not available	not available	not available	not available	not available	not available	not available	not available	not available	not available	not available	not available	not available	not available	not available	not available	8.7	not available	not available	not detected	26.7	not detected	not available	not detected	not detected
8	Tsibart, Gennadiev et al. (2014)	Shatura District, Moscow, Russia, 2002, 2010, 2012			Peatlands overlying ancient alluvial deposits	Control pit 1	Sod podzols	A (1-10 cm)					11	not available	not available	not available	not available	not available	not available	not available	not available	not available	not available	not available	not available	not available	not available	not available	not available	not available	not available	not available	not available	not available	not available	not available	not available	not available	not available	not available	2.7	not available	not available	not detected	6.3	0.3	not available	not detected	0.9
8	Tsibart, Gennadiev et al. (2014)	Shatura District, Moscow, Russia, 2002, 2010, 2012			Peatlands overlying ancient alluvial deposits	Control pit 1	Sod podzols	A (10-18 cm)					11	not available	not available	not available	not available	not available	not available	not available	not available	not available	not available	not available	not available	not available	not available	not available	not available	not available	not available	not available	not available	not available	not available	not available	not available	not available	not available	not available	6.9	not available	not available	not detected	11.8	not detected	not available	not detected	12.1
8	Tsibart, Gennadiev et al. (2014)	Shatura District, Moscow, Russia, 2002, 2010, 2012			Peatlands overlying ancient alluvial deposits	Control pit 1	Sod podzols	E (18-26 cm)					11	not available	not available	not available	not available	not available	not available	not available	not available	not available	not available	not available	not available	not available	not available	not available	not available	not available	not available	not available	not available	not available	not available	not available	not available	not available	not available	not available	3.3	not available	not available	not detected	2.3	not detected	not available	not detected	0.1
8	Tsibart, Gennadiev et al. (2014)	Shatura District, Moscow, Russia, 2002, 2010, 2012			Peatlands overlying ancient alluvial deposits	Control pit 1	Sod podzols	E/Bhs (26-37 cm)					11	not available	not available	not available	not available	not available	not available	not available	not available	not available	not available	not available	not available	not available	not available	not available	not available	not available	not available	not available	not available	not available	not available	not available	not available	not available	not available	not available	5.3	not available	not available	not detected	not detected	not detected	not available	0.1	not detected
8	Tsibart, Gennadiev et al. (2014)	Shatura District, Moscow, Russia, 2002, 2010, 2012			Peatlands overlying ancient alluvial deposits	Control pit 1	Sod podzols	Bhs (37-55 cm)					11	not available	not available	not available	not available	not available	not available	not available	not available	not available	not available	not available	not available	not available	not available	not available	not available	not available	not available	not available	not available	not available	not available	not available	not available	not available	not available	not available	3	not available	not available	not detected	not detected	not detected	not available	not detected	not detected
8	Tsibart, Gennadiev et al. (2014)	Shatura District, Moscow, Russia, 2002, 2010, 2012			Peatlands overlying ancient alluvial deposits	Control pit 1	Sod podzols	Cs (55-65 cm)					11	not available	not available	not available	not available	not available	not available	not available	not available	not available	not available	not available	not available	not available	not available	not available	not available	not available	not available	not available	not available	not available	not available	not available	not available	not available	not available	not available	not detected	not available	not available	not detected	not detected	not detected	not available	not detected	not detected
8	Tsibart, Gennadiev et al. (2014)	Shatura District, Moscow, Russia, 2012			Peatlands overlying ancient alluvial deposits	Pit 11	Histosols	O (0-0.5 cm)					14	not available	not available	not available	not available	not available	not available	not available	not available	not available	not available	not available	not available	not available	not available	not available	not available	not available	not available	not available	not available	not available	not available	not available	not available	not available	not available	not available	55.5	not available	not available	not detected	19.4	0.3	not available	1.1	not detected
8	Tsibart, Gennadiev et al. (2014)	Shatura District, Moscow, Russia, 2012			Peatlands overlying ancient alluvial deposits	Pit 11	Histosols	Cpir (0.5–2 cm)					14	not available	not available	not available	not available	not available	not available	not available	not available	not available	not available	not available	not available	not available	not available	not available	not available	not available	not available	not available	not available	not available	not available	not available	not available	not available	not available	not available	8.3	not available	not available	not detected	not detected	0.1	not available	0.1	not detected
8	Tsibart, Gennadiev et al. (2014)	Shatura District, Moscow, Russia, 2012			Peatlands overlying ancient alluvial deposits	Pit 11	Histosols	Hpir (2–7 cm)					14	not available	not available	not available	not available	not available	not available	not available	not available	not available	not available	not available	not available	not available	not available	not available	not available	not available	not available	not available	not available	not available	not available	not available	not available	not available	not available	not available	0.9	not available	not available	not detected	0.6	not detected	not available	not detected	0.1
8	Tsibart, Gennadiev et al. (2014)	Shatura District, Moscow, Russia, 2012			Peatlands overlying ancient alluvial deposits	Pit 11	Histosols	He (7–8 cm)					14	not available	not available	not available	not available	not available	not available	not available	not available	not available	not available	not available	not available	not available	not available	not available	not available	not available	not available	not available	not available	not available	not available	not available	not available	not available	not available	not available	1.4	not available	not available	not detected	0.4	not detected	not available	not detected	0.3
8	Tsibart, Gennadiev et al. (2014)	Shatura District, Moscow, Russia, 2012			Peatlands overlying ancient alluvial deposits	Pit 11	Histosols	He (8-14 cm)					14	not available	not available	not available	not available	not available	not available	not available	not available	not available	not available	not available	not available	not available	not available	not available	not available	not available	not available	not available	not available	not available	not available	not available	not available	not available	not available	not available	not detected	not available	not available	not detected	not detected	not detected	not available	not detected	not detected
8	Tsibart, Gennadiev et al. (2014)	Shatura District, Moscow, Russia, 2012			Peatlands overlying ancient alluvial deposits	Pit 11	Histosols	Ch (14-26 cm)					14	not available	not available	not available	not available	not available	not available	not available	not available	not available	not available	not available	not available	not available	not available	not available	not available	not available	not available	not available	not available	not available	not available	not available	not available	not available	not available	not available	1.2	not available	not available	not detected	not detected	not detected	not available	0.2	0.1
8	Tsibart, Gennadiev et al. (2014)	Shatura District, Moscow, Russia, 2012			Peatlands overlying ancient alluvial deposits	Pit 11	Histosols	Cs (26-38 cm)					14	not available	not available	not available	not available	not available	not available	not available	not available	not available	not available	not available	not available	not available	not available	not available	not available	not available	not available	not available	not available	not available	not available	not available	not available	not available	not available	not available	1.2	not available	not available	not detected	1.5	not detected	not available	0.2	6.5
8	Tsibart, Gennadiev et al. (2014)	Shatura District, Moscow, Russia, 2012			Peatlands overlying ancient alluvial deposits	Pit 11	Histosols	Cs (38-50 cm)					14	not available	not available	not available	not available	not available	not available	not available	not available	not available	not available	not available	not available	not available	not available	not available	not available	not available	not available	not available	not available	not available	not available	not available	not available	not available	not available	not available	not detected	not available	not available	not detected	not detected	not detected	not available	not detected	not detected
8	Tsibart, Gennadiev et al. (2014)	Shatura District, Moscow, Russia, 2012			Peatlands overlying ancient alluvial deposits	Pit 11	Histosols	C (50-60 cm)					14	not available	not available	not available	not available	not available	not available	not available	not available	not available	not available	not available	not available	not available	not available	not available	not available	not available	not available	not available	not available	not available	not available	not available	not available	not available	not available	not available	1.8	not available	not available	not detected	not detected	not detected	not available	0.2	0.1
8	Tsibart, Gennadiev et al. (2014)	Shatura District, Moscow, Russia, 2012			Peatlands overlying ancient alluvial deposits	Pit 11	Histosols	C (60-70 cm)					14	not available	not available	not available	not available	not available	not available	not available	not available	not available	not available	not available	not available	not available	not available	not available	not available	not available	not available	not available	not available	not available	not available	not available	not available	not available	not available	not available	1	not available	not available	not detected	not detected	not detected	not available	0.2	not detected
8	Tsibart, Gennadiev et al. (2014)	Shatura District, Moscow, Russia, 2012			Peatlands overlying ancient alluvial deposits	Pit 11	Histosols	C (70-80 cm)					14	not available	not available	not available	not available	not available	not available	not available	not available	not available	not available	not available	not available	not available	not available	not available	not available	not available	not available	not available	not available	not available	not available	not available	not available	not available	not available	not available	not detected	not available	not available	not detected	not detected	not detected	not available	not detected	not detected
8	Tsibart, Gennadiev et al. (2014)	Shatura District, Moscow, Russia, 2012			Peatlands overlying ancient alluvial deposits	Pit 11	Histosols	C (80-90 cm)					14	not available	not available	not available	not available	not available	not available	not available	not available	not available	not available	not available	not available	not available	not available	not available	not available	not available	not available	not available	not available	not available	not available	not available	not available	not available	not available	not available	0.5	not available	not available	not detected	not detected	not detected	not available	0.2	not detected
8	Tsibart, Gennadiev et al. (2014)	Shatura District, Moscow, Russia, 2002			Peatlands overlying ancient alluvial deposits	Pit 5	Sod podzols	O (0-2 cm)				10 years	14	not available	not available	not available	not available	not available	not available	not available	not available	not available	not available	not available	not available	not available	not available	not available	not available	not available	not available	not available	not available	not available	not available	not available	not available	not available	not available	not available	9.4	not available	not available	not detected	not detected	not detected	not available	not detected	not detected
8	Tsibart, Gennadiev et al. (2014)	Shatura District, Moscow, Russia, 2002			Peatlands overlying ancient alluvial deposits	Pit 5	Sod podzols	Cpir (2-3 cm)				10 years	14	not available	not available	not available	not available	not available	not available	not available	not available	not available	not available	not available	not available	not available	not available	not available	not available	not available	not available	not available	not available	not available	not available	not available	not available	not available	not available	not available	11.2	not available	not available	not detected	38.8	62.7	not available	0.8	not detected
8	Tsibart, Gennadiev et al. (2014)	Shatura District, Moscow, Russia, 2002			Peatlands overlying ancient alluvial deposits	Pit 5	Sod podzols	Apir (3-6 cm)				10 years	14	not available	not available	not available	not available	not available	not available	not available	not available	not available	not available	not available	not available	not available	not available	not available	not available	not available	not available	not available	not available	not available	not available	not available	not available	not available	not available	not available	48.2	not available	not available	not detected	not detected	not detected	not available	0.8	not detected
8	Tsibart, Gennadiev et al. (2014)	Shatura District, Moscow, Russia, 2002			Peatlands overlying ancient alluvial deposits	Pit 5	Sod podzols	E (6-10 cm)				10 years	14	not available	not available	not available	not available	not available	not available	not available	not available	not available	not available	not available	not available	not available	not available	not available	not available	not available	not available	not available	not available	not available	not available	not available	not available	not available	not available	not available	5.5	not available	not available	not detected	not detected	not detected	not available	not detected	not detected
8	Tsibart, Gennadiev et al. (2014)	Shatura District, Moscow, Russia, 2002			Peatlands overlying ancient alluvial deposits	Pit 5	Sod podzols	Ha (10-20 cm)				10 years	14	not available	not available	not available	not available	not available	not available	not available	not available	not available	not available	not available	not available	not available	not available	not available	not available	not available	not available	not available	not available	not available	not available	not available	not available	not available	not available	not available	6.1	not available	not available	not detected	not detected	not detected	not available	not detected	0.5
8	Tsibart, Gennadiev et al. (2014)	Shatura District, Moscow, Russia, 2002			Peatlands overlying ancient alluvial deposits	Pit 5	Sod podzols	Ha (20-30 cm)				10 years	14	not available	not available	not available	not available	not available	not available	not available	not available	not available	not available	not available	not available	not available	not available	not available	not available	not available	not available	not available	not available	not available	not available	not available	not available	not available	not available	not available	4.4	not available	not available	not detected	not detected	not detected	not available	not detected	not detected
8	Tsibart, Gennadiev et al. (2014)	Shatura District, Moscow, Russia, 2002			Peatlands overlying ancient alluvial deposits	Pit 5	Sod podzols	Bhs (30-40 cm)				10 years	14	not available	not available	not available	not available	not available	not available	not available	not available	not available	not available	not available	not available	not available	not available	not available	not available	not available	not available	not available	not available	not available	not available	not available	not available	not available	not available	not available	3.6	not available	not available	not detected	not detected	not detected	not available	not detected	not detected
8	Tsibart, Gennadiev et al. (2014)	Shatura District, Moscow, Russia, 2002			Peatlands overlying ancient alluvial deposits	Pit 5	Sod podzols	Bhs (40-50 cm)				10 years	14	not available	not available	not available	not available	not available	not available	not available	not available	not available	not available	not available	not available	not available	not available	not available	not available	not available	not available	not available	not available	not available	not available	not available	not available	not available	not available	not available	1.4	not available	not available	not detected	not detected	not detected	not available	not detected	not detected
8	Tsibart, Gennadiev et al. (2014)	Shatura District, Moscow, Russia, 2002			Peatlands overlying ancient alluvial deposits	Pit 5	Sod podzols	Bhs (50-60 cm)				10 years	14	not available	not available	not available	not available	not available	not available	not available	not available	not available	not available	not available	not available	not available	not available	not available	not available	not available	not available	not available	not available	not available	not available	not available	not available	not available	not available	not available	3.7	not available	not available	not detected	not detected	not detected	not available	not detected	not detected
8	Tsibart, Gennadiev et al. (2014)	Shatura District, Moscow, Russia, 2002			Peatlands overlying ancient alluvial deposits	Pit 5	Sod podzols	BC (60-70 cm)				10 years	14	not available	not available	not available	not available	not available	not available	not available	not available	not available	not available	not available	not available	not available	not available	not available	not available	not available	not available	not available	not available	not available	not available	not available	not available	not available	not available	not available	1	not available	not available	not detected	not detected	not detected	not available	not detected	0.9
8	Tsibart, Gennadiev et al. (2014)	Shatura District, Moscow, Russia, 2010			Peatlands overlying ancient alluvial deposits	Pit 8	Sod podzols	O (0-1 cm)				2 years	14	not available	not available	not available	not available	not available	not available	not available	not available	not available	not available	not available	not available	not available	not available	not available	not available	not available	not available	not available	not available	not available	not available	not available	not available	not available	not available	not available	36.2	not available	not available	not detected	not detected	not detected	not available	not detected	5.5
8	Tsibart, Gennadiev et al. (2014)	Shatura District, Moscow, Russia, 2010			Peatlands overlying ancient alluvial deposits	Pit 8	Sod podzols	Apir (1-2 cm)				2 years	14	not available	not available	not available	not available	not available	not available	not available	not available	not available	not available	not available	not available	not available	not available	not available	not available	not available	not available	not available	not available	not available	not available	not available	not available	not available	not available	not available	10.7	not available	not available	not detected	not detected	0.5	not available	0.1	not detected
8	Tsibart, Gennadiev et al. (2014)	Shatura District, Moscow, Russia, 2010			Peatlands overlying ancient alluvial deposits	Pit 8	Sod podzols	H (4-7 cm)				2 years	14	not available	not available	not available	not available	not available	not available	not available	not available	not available	not available	not available	not available	not available	not available	not available	not available	not available	not available	not available	not available	not available	not available	not available	not available	not available	not available	not available	40.2	not available	not available	not detected	11.6	not detected	not available	8.2	not detected
8	Tsibart, Gennadiev et al. (2014)	Shatura District, Moscow, Russia, 2010			Peatlands overlying ancient alluvial deposits	Pit 8	Sod podzols	Hpir (2-7 cm)				2 years	14	not available	not available	not available	not available	not available	not available	not available	not available	not available	not available	not available	not available	not available	not available	not available	not available	not available	not available	not available	not available	not available	not available	not available	not available	not available	not available	not available	42.4	not available	not available	not detected	not detected	not detected	not available	not detected	not detected
8	Tsibart, Gennadiev et al. (2014)	Shatura District, Moscow, Russia, 2010			Peatlands overlying ancient alluvial deposits	Pit 8	Sod podzols	Ha (7-9 cm)				2 years	14	not available	not available	not available	not available	not available	not available	not available	not available	not available	not available	not available	not available	not available	not available	not available	not available	not available	not available	not available	not available	not available	not available	not available	not available	not available	not available	not available	5.4	not available	not available	not detected	not detected	not detected	not available	not detected	0.7
8	Tsibart, Gennadiev et al. (2014)	Shatura District, Moscow, Russia, 2010			Peatlands overlying ancient alluvial deposits	Pit 8	Sod podzols	Ha (9-14 cm)				2 years	14	not available	not available	not available	not available	not available	not available	not available	not available	not available	not available	not available	not available	not available	not available	not available	not available	not available	not available	not available	not available	not available	not available	not available	not available	not available	not available	not available	1	not available	not available	not detected	not detected	not detected	not available	not detected	not detected
8	Tsibart, Gennadiev et al. (2014)	Shatura District, Moscow, Russia, 2010			Peatlands overlying ancient alluvial deposits	Pit 8	Sod podzols	E (14-25 cm)				2 years	14	not available	not available	not available	not available	not available	not available	not available	not available	not available	not available	not available	not available	not available	not available	not available	not available	not available	not available	not available	not available	not available	not available	not available	not available	not available	not available	not available	1.3	not available	not available	not detected	not detected	not detected	not available	not detected	0.1
8	Tsibart, Gennadiev et al. (2014)	Shatura District, Moscow, Russia, 2010			Peatlands overlying ancient alluvial deposits	Pit 8	Sod podzols	E (25-30 cm)				2 years	14	not available	not available	not available	not available	not available	not available	not available	not available	not available	not available	not available	not available	not available	not available	not available	not available	not available	not available	not available	not available	not available	not available	not available	not available	not available	not available	not available	not detected	not available	not available	not detected	not detected	not detected	not available	not detected	not detected
8	Tsibart, Gennadiev et al. (2014)	Shatura District, Moscow, Russia, 2010			Peatlands overlying ancient alluvial deposits	Pit 8	Sod podzols	Bs (30-40 cm)				2 years	14	not available	not available	not available	not available	not available	not available	not available	not available	not available	not available	not available	not available	not available	not available	not available	not available	not available	not available	not available	not available	not available	not available	not available	not available	not available	not available	not available	1.2	not available	not available	not detected	not detected	not detected	not available	not detected	not detected
8	Tsibart, Gennadiev et al. (2014)	Shatura District, Moscow, Russia, 2010			Peatlands overlying ancient alluvial deposits	Pit 8	Sod podzols	Bs (40-50 cm)				2 years	14	not available	not available	not available	not available	not available	not available	not available	not available	not available	not available	not available	not available	not available	not available	not available	not available	not available	not available	not available	not available	not available	not available	not available	not available	not available	not available	not available	0.7	not available	not available	not detected	not detected	not detected	not available	not detected	not detected
8	Tsibart, Gennadiev et al. (2014)	Shatura District, Moscow, Russia, 2010			Peatlands overlying ancient alluvial deposits	Pit 8	Sod podzols	O (0-1 cm)				2 years	14	not available	not available	not available	not available	not available	not available	not available	not available	not available	not available	not available	not available	not available	not available	not available	not available	not available	not available	not available	not available	not available	not available	not available	not available	not available	not available	not available	2.4	not available	not available	not detected	not detected	not detected	not available	not detected	not detected
8	Tsibart, Gennadiev et al. (2014)	Shatura District, Moscow, Russia, 2010			Peatlands overlying ancient alluvial deposits	Pit 8	Sod podzols	Cpir (1-4 cm)				2 years	14	not available	not available	not available	not available	not available	not available	not available	not available	not available	not available	not available	not available	not available	not available	not available	not available	not available	not available	not available	not available	not available	not available	not available	not available	not available	not available	not available	11.5	not available	not available	not detected	not detected	0.4	not available	0.3	not detected
8	Tsibart, Gennadiev et al. (2014)	Shatura District, Moscow, Russia, 2010			Peatlands overlying ancient alluvial deposits	Pit 8	Sod podzols	Apir (4-5 cm)				2 years	14	not available	not available	not available	not available	not available	not available	not available	not available	not available	not available	not available	not available	not available	not available	not available	not available	not available	not available	not available	not available	not available	not available	not available	not available	not available	not available	not available	30.2	not available	not available	not detected	22.6	13.2	not available	not detected	3.5
8	Tsibart, Gennadiev et al. (2014)	Shatura District, Moscow, Russia, 2010			Peatlands overlying ancient alluvial deposits	Pit 8	Sod podzols	A (5-7 cm)				2 years	14	not available	not available	not available	not available	not available	not available	not available	not available	not available	not available	not available	not available	not available	not available	not available	not available	not available	not available	not available	not available	not available	not available	not available	not available	not available	not available	not available	10.7	not available	not available	not detected	7.8	not detected	not available	not detected	not detected
8	Tsibart, Gennadiev et al. (2014)	Shatura District, Moscow, Russia, 2010			Peatlands overlying ancient alluvial deposits	Pit 8	Sod podzols	E (7-12 cm)				2 years	14	not available	not available	not available	not available	not available	not available	not available	not available	not available	not available	not available	not available	not available	not available	not available	not available	not available	not available	not available	not available	not available	not available	not available	not available	not available	not available	not available	1.6	not available	not available	not detected	not detected	not detected	not available	not detected	not detected
8	Tsibart, Gennadiev et al. (2014)	Shatura District, Moscow, Russia, 2010			Peatlands overlying ancient alluvial deposits	Pit 8	Sod podzols	EB (12-20 cm)				2 years	14	not available	not available	not available	not available	not available	not available	not available	not available	not available	not available	not available	not available	not available	not available	not available	not available	not available	not available	not available	not available	not available	not available	not available	not available	not available	not available	not available	1.5	not available	not available	not detected	not detected	not detected	not available	not detected	not detected
8	Tsibart, Gennadiev et al. (2014)	Shatura District, Moscow, Russia, 2010			Peatlands overlying ancient alluvial deposits	Pit 8	Sod podzols	Bs (20-30 cm)				2 years	14	not available	not available	not available	not available	not available	not available	not available	not available	not available	not available	not available	not available	not available	not available	not available	not available	not available	not available	not available	not available	not available	not available	not available	not available	not available	not available	not available	3.3	not available	not available	not detected	not detected	not detected	not available	not detected	not detected
8	Tsibart, Gennadiev et al. (2014)	Shatura District, Moscow, Russia, 2010			Peatlands overlying ancient alluvial deposits	Pit 8	Sod podzols	Bs (30-40 cm)				2 years	14	not available	not available	not available	not available	not available	not available	not available	not available	not available	not available	not available	not available	not available	not available	not available	not available	not available	not available	not available	not available	not available	not available	not available	not available	not available	not available	not available	12.2	not available	not available	not detected	not detected	not detected	not available	not detected	not detected
8	Tsibart, Gennadiev et al. (2014)	Shatura District, Moscow, Russia, 2010			Peatlands overlying ancient alluvial deposits	Pit 8	Sod podzols	B (40-50 cm)				2 years	14	not available	not available	not available	not available	not available	not available	not available	not available	not available	not available	not available	not available	not available	not available	not available	not available	not available	not available	not available	not available	not available	not available	not available	not available	not available	not available	not available	11.4	not available	not available	not detected	not detected	not detected	not available	not detected	not detected
8	Tsibart, Gennadiev et al. (2014)	Shatura District, Moscow, Russia, 2012			Peatlands overlying ancient alluvial deposits	Pit 13	Histosols	O (0-3 cm)				Immediately	14	not available	not available	not available	not available	not available	not available	not available	not available	not available	not available	not available	not available	not available	not available	not available	not available	not available	not available	not available	not available	not available	not available	not available	not available	not available	not available	not available	9.2	not available	not available	not detected	not detected	not detected	not available	0.3	not detected
8	Tsibart, Gennadiev et al. (2014)	Shatura District, Moscow, Russia, 2012			Peatlands overlying ancient alluvial deposits	Pit 13	Histosols	Hpir (3-5 cm)				Immediately	14	not available	not available	not available	not available	not available	not available	not available	not available	not available	not available	not available	not available	not available	not available	not available	not available	not available	not available	not available	not available	not available	not available	not available	not available	not available	not available	not available	285.8	not available	not available	not detected	not detected	46.8	not available	not detected	not detected
8	Tsibart, Gennadiev et al. (2014)	Shatura District, Moscow, Russia, 2012			Peatlands overlying ancient alluvial deposits	Pit 13	Histosols	He (7-16 cm)				Immediately	14	not available	not available	not available	not available	not available	not available	not available	not available	not available	not available	not available	not available	not available	not available	not available	not available	not available	not available	not available	not available	not available	not available	not available	not available	not available	not available	not available	68.5	not available	not available	not detected	21.3	not detected	not available	not detected	not detected
8	Tsibart, Gennadiev et al. (2014)	Shatura District, Moscow, Russia, 2012			Peatlands overlying ancient alluvial deposits	Pit 14	Histosols	Hpir (0-1 cm）				Immediately	14	not available	not available	not available	not available	not available	not available	not available	not available	not available	not available	not available	not available	not available	not available	not available	not available	not available	not available	not available	not available	not available	not available	not available	not available	not available	not available	not available	31.4	not available	not available	not detected	21	not detected	not available	8.3	12.5
8	Tsibart, Gennadiev et al. (2014)	Shatura District, Moscow, Russia, 2012			Peatlands overlying ancient alluvial deposits	Pit 14	Histosols	He (1-10 cm)				Immediately	14	not available	not available	not available	not available	not available	not available	not available	not available	not available	not available	not available	not available	not available	not available	not available	not available	not available	not available	not available	not available	not available	not available	not available	not available	not available	not available	not available	39.8	not available	not available	not detected	not detected	not detected	not available	not detected	77.9
8	Tsibart, Gennadiev et al. (2014)	Shatura District, Moscow, Russia, 2012			Peatlands overlying ancient alluvial deposits	Pit 14	Histosols	Cpir (10-11 cm)				Immediately	14	not available	not available	not available	not available	not available	not available	not available	not available	not available	not available	not available	not available	not available	not available	not available	not available	not available	not available	not available	not available	not available	not available	not available	not available	not available	not available	not available	70.3	not available	not available	not detected	8.5	not detected	not available	2.8	3.5
8	Tsibart, Gennadiev et al. (2014)	Shatura District, Moscow, Russia, 2012			Peatlands overlying ancient alluvial deposits	Pit 14	Histosols	Hpir (11-11.5 cm）				Immediately	14	not available	not available	not available	not available	not available	not available	not available	not available	not available	not available	not available	not available	not available	not available	not available	not available	not available	not available	not available	not available	not available	not available	not available	not available	not available	not available	not available	15.2	not available	not available	not detected	not detected	not detected	not available	not detected	not detected
8	Tsibart, Gennadiev et al. (2014)	Shatura District, Moscow, Russia, 2012			Peatlands overlying ancient alluvial deposits	Pit 14	Histosols	He (11.5-20 cm)				Immediately	14	not available	not available	not available	not available	not available	not available	not available	not available	not available	not available	not available	not available	not available	not available	not available	not available	not available	not available	not available	not available	not available	not available	not available	not available	not available	not available	not available	120.5	not available	not available	not detected	not detected	15.6	not available	not detected	not detected
8	Tsibart, Gennadiev et al. (2014)	Shatura District, Moscow, Russia, 2012			Peatlands overlying ancient alluvial deposits	Pit 14	Histosols	He (20-30 cm)				Immediately	14	not available	not available	not available	not available	not available	not available	not available	not available	not available	not available	not available	not available	not available	not available	not available	not available	not available	not available	not available	not available	not available	not available	not available	not available	not available	not available	not available	66.6	not available	not available	not detected	not detected	not detected	not available	not detected	not detected
8	Tsibart, Gennadiev et al. (2014)	Shatura District, Moscow, Russia, 2012			Peatlands overlying ancient alluvial deposits	Pit 14	Histosols	He (30-40 cm)				Immediately	14	not available	not available	not available	not available	not available	not available	not available	not available	not available	not available	not available	not available	not available	not available	not available	not available	not available	not available	not available	not available	not available	not available	not available	not available	not available	not available	not available	60.1	not available	not available	not detected	not detected	not detected	not available	1.9	3.1
8	Tsibart, Gennadiev et al. (2014)	Shatura District, Moscow, Russia, 2012			Peatlands overlying ancient alluvial deposits	Pit 14	Histosols	He (40-45 cm)				Immediately	14	not available	not available	not available	not available	not available	not available	not available	not available	not available	not available	not available	not available	not available	not available	not available	not available	not available	not available	not available	not available	not available	not available	not available	not available	not available	not available	not available	114.3	not available	not available	not detected	not detected	not detected	not available	not detected	1.3
9	Choi (2014)	Pohang, South Korea, April 16, 2004	Forest wildfire	Mild	Five sampling sites (1-5) in the burnt area	Burned area	Pine bark			Pine	Forest	1 month	16	76.7	not detected	0.76	2.36	19.1	1.58	12.6	6.45	0.85	2.77	0.58	0.87	not detected	not detected	not detected	not detected	not available	not available	not available	124	0.39147	123.17	1.45	84.9448	0.661417	0.0764023	not available	4900	194	48.7	145	505	57.4	50.2	7.83	5.8
9	Choi (2014)	Pohang, South Korea, April 16, 2004	Forest wildfire	Mild	Five sampling sites (1-5) in the burnt area	Burned area	Pine bark			Pine	Forest	3 months	16	76.7	not detected	0.76	2.36	19.1	1.58	12.6	6.45	0.85	2.77	0.58	0.87	not detected	not detected	not detected	not detected	not available	not available	not available	124	0.39147	123.17	1.45	84.9448	0.661417	0.0764023	not available	977	35.4	11.6	37.5	130	18.5	117	2.92	6.61
9	Choi (2014)	Pohang, South Korea, April 16, 2004	Forest wildfire	Mild	Five sampling sites (1-5) in the burnt area	Burned area	Pine bark			Pine	Forest	5 months	16	76.7	not detected	0.76	2.36	19.1	1.58	12.6	6.45	0.85	2.77	0.58	0.87	not detected	not detected	not detected	not detected	not available	not available	not available	124	0.39147	123.17	1.45	84.9448	0.661417	0.0764023	not available	748	12.1	6.23	21.6	70.6	7.97	31.1	7.37	3.74
9	Choi (2014)	Pohang, South Korea, April 16, 2004	Forest wildfire	Mild	Five sampling sites (1-5) in the burnt area	Burned area	Pine bark			Pine	Forest	7 months	16	76.7	not detected	0.76	2.36	19.1	1.58	12.6	6.45	0.85	2.77	0.58	0.87	not detected	not detected	not detected	not detected	not available	not available	not available	124	0.39147	123.17	1.45	84.9448	0.661417	0.0764023	not available	550	15	5.63	18.7	63.2	6.94	32.4	8.22	3.91
9	Choi (2014)	Pohang, South Korea, April 16, 2004	Forest wildfire	Mild	Five sampling sites (1-5) in the burnt area	Burned area	Litter (ash)			Pine	Forest	1 month	16	11	not detected	0.61	0.74	6.23	1.64	7.55	7.28	3.51	10.5	10.6	0.45	4.21	6.75	not detected	4.24	not available	not available	not available	75.2	6.31231	49.06	26.25	1.86895	0.509103	0.208386	0.614195	1030	55.2	21.7	56.5	172	26.3	69.6	37.4	14
9	Choi (2014)	Pohang, South Korea, April 16, 2004	Forest wildfire	Mild	Five sampling sites (1-5) in the burnt area	Burned area	Litter (ash)			Pine	Forest	3 months	16	11	not detected	0.61	0.74	6.23	1.64	7.55	7.28	3.51	10.5	10.6	0.45	4.21	6.75	not detected	4.24	not available	not available	not available	75.2	6.31231	49.06	26.25	1.86895	0.509103	0.208386	0.614195	213	11.3	5.45	15.9	81.3	11.5	39	25.1	8.83
9	Choi (2014)	Pohang, South Korea, April 16, 2004	Forest wildfire	Mild	Five sampling sites (1-5) in the burnt area	Burned area	Litter (ash)			Pine	Forest	5 months	16	11	not detected	0.61	0.74	6.23	1.64	7.55	7.28	3.51	10.5	10.6	0.45	4.21	6.75	not detected	4.24	not available	not available	not available	75.2	6.31231	49.06	26.25	1.86895	0.509103	0.208386	0.614195	134	6.62	3.68	10.3	88.6	10.5	38.9	31.9	10.7
9	Choi (2014)	Pohang, South Korea, April 16, 2004	Forest wildfire	Mild	Five sampling sites (1-5) in the burnt area	Burned area	Litter (ash)			Pine	Forest	7 months	16	11	not detected	0.61	0.74	6.23	1.64	7.55	7.28	3.51	10.5	10.6	0.45	4.21	6.75	not detected	4.24	not available	not available	not available	75.2	6.31231	49.06	26.25	1.86895	0.509103	0.208386	0.614195	146	7.48	2.94	10.5	72.8	9.05	35.6	28.6	9.61
9	Choi (2014)	Pohang, South Korea, April 16, 2004	Forest wildfire	Mild	Five sampling sites (1-5) in the burnt area	Burned area	Soil	0-5 cm		Pine	Forest	1 month	16	3.04	0.5	0.53	0.17	1.7	1.52	3.36	3.89	1.65	4.67	1.63	not detected	2.51	not detected	not detected	0.64	not available	not available	not available	25.6	2.97709	21.03	4.78	4.39958	0.463448	0.47205	not available	22.6	2.4	1.44	5.51	26.5	5.42	17.4	13.2	5.59
9	Choi (2014)	Pohang, South Korea, April 16, 2004	Forest wildfire	Mild	Five sampling sites (1-5) in the burnt area	Burned area	Soil	0-5 cm		Pine	Forest	3 months	16	3.04	0.5	0.53	0.17	1.7	1.52	3.36	3.89	1.65	4.67	1.63	not detected	2.51	not detected	not detected	0.64	not available	not available	not available	25.6	2.97709	21.03	4.78	4.39958	0.463448	0.47205	not available	33.9	1.37	1.04	1.5	10.9	3.16	10.2	9.76	3.61
9	Choi (2014)	Pohang, South Korea, April 16, 2004	Forest wildfire	Mild	Five sampling sites (1-5) in the burnt area	Burned area	Soil	0-5 cm		Pine	Forest	5 months	16	3.04	0.5	0.53	0.17	1.7	1.52	3.36	3.89	1.65	4.67	1.63	not detected	2.51	not detected	not detected	0.64	not available	not available	not available	25.6	2.97709	21.03	4.78	4.39958	0.463448	0.47205	not available	23.8	0.6	0.74	0.34	4.3	2.3	5.26	5.47	2.24
9	Choi (2014)	Pohang, South Korea, April 16, 2004	Forest wildfire	Mild	Five sampling sites (1-5) in the burnt area	Burned area	Soil	0-5 cm		Pine	Forest	7 months	16	3.04	0.5	0.53	0.17	1.7	1.52	3.36	3.89	1.65	4.67	1.63	not detected	2.51	not detected	not detected	0.64	not available	not available	not available	25.6	2.97709	21.03	4.78	4.39958	0.463448	0.47205	not available	10.4	0.55	0.63	0.96	4.98	2.29	4.72	4.77	1.48
10	Sojinu, Sonibare et al. (2011)	Igbanke, Nigeria	Forest wildfire	Mild	Occasional forest burning yearly	Burned area L1	Soil	0-10 cm		Mangroves	Forest	2-3 months	16	5.92±0.96	0.14±0.02	0.30±0.05	1.02±0.17	1.05±0.17	0.19±0.03	0.36±0.06	0.69±0.11	0.80±0.13	1.18±0.19	3.61±0.59	1.65±0.27	0.66±0.11	0.30±0.05	0.00±0.00	0.61±0.10	not available	not available	not available	18.5	1.35	11.65	6.83	1.70571	0.342857	0.153226	0.32967	28.0±5.25	0.38±0.07	0.38±0.07	2.84±0.53	2.88±0.54	0.40±0.07	1.00±0.19	2.72±0.51	2.17±0.41
10	Sojinu, Sonibare et al. (2011)	Igbanke, Nigeria	Forest wildfire	Mild	Occasional forest burning yearly	Burned area L2	Soil	0-10 cm		Mangroves	Forest	2-3 months	16	5.92±0.96	0.14±0.02	0.30±0.05	1.02±0.17	1.05±0.17	0.19±0.03	0.36±0.06	0.69±0.11	0.80±0.13	1.18±0.19	3.61±0.59	1.65±0.27	0.66±0.11	0.30±0.05	0.00±0.00	0.61±0.10	not available	not available	not available	18.5	1.35	11.65	6.83	1.70571	0.342857	0.153226	0.32967	12.6±1.87	0.26±0.04	0.36±0.05	5.85±0.86	3.28±0.48	0.53±0.08	0.70±0.10	5.01±0.74	4.79±0.71
10	Sojinu, Sonibare et al. (2011)	Igbanke, Nigeria	Forest wildfire	Mild	Occasional forest burning yearly	Burned area L3	Soil	0-10 cm		Mangroves	Forest	2-3 months	16	5.92±0.96	0.14±0.02	0.30±0.05	1.02±0.17	1.05±0.17	0.19±0.03	0.36±0.06	0.69±0.11	0.80±0.13	1.18±0.19	3.61±0.59	1.65±0.27	0.66±0.11	0.30±0.05	0.00±0.00	0.61±0.10	not available	not available	not available	18.5	1.35	11.65	6.83	1.70571	0.342857	0.153226	0.32967	6.6±11.7	0.39±0.16	1.11±0.18	22.3±2.44	12.6±1.49	1.81±0.23	1.11±0.43	18.4±2.09	14.3±2.00
11	Chrysikou, Gemenetzis et al. (2008)	Tagarades, Northern Greece, July 15, 2006	Landfill fire	Sever	Inside the landfill	S0_landfill	Soil	0-5 cm		Mainly vegetable		15 days	17	not available	not available	not available	not available	not available	not available	not available	not available	not available	not available	not available	not available	not available	not available	not available	not available	not available	not available	not available	not available	not available	not available	not available	not available	not available	not available	not available	1192	not available	not available	0.94	0.03	10.7	52.8	31.1	8.12
11	Chrysikou, Gemenetzis et al. (2008)	Tagarades, Northern Greece, July 15, 2006	Landfill fire	Sever	0.5–10 km from the landfill	S1	Soil	0-5 cm		Mainly vegetable		15 days	17	3.13	not available	not available	0.9	0.47	0.11	1	0.08	0.13	0.1	0.17	0.02	0.06	0.76	0.14	0.13	0.5	4.04	0.28	12	0.26	5.92	1.28	4.625	0.925926	0.189655	0.853933	3.2	not available	not available	2.05	1.02	0.11	1.02	0.08	0.9
11	Chrysikou, Gemenetzis et al. (2008)	Tagarades, Northern Greece, July 15, 2006	Landfill fire	Sever	0.5–10 km from the landfill	S2	Soil	0-5 cm		Mainly vegetable		15 days	17	3.13	not available	not available	0.9	0.47	0.11	1	0.08	0.13	0.1	0.17	0.02	0.06	0.76	0.14	0.13	0.5	4.04	0.28	12	0.26	5.92	1.28	4.625	0.925926	0.189655	0.853933	6.37	not available	not available	1	3.62	0.11	0.13	0.25	0.13
11	Chrysikou, Gemenetzis et al. (2008)	Tagarades, Northern Greece, July 15, 2006	Landfill fire	Sever	0.5–10 km from the landfill	S3	Soil	0-5 cm		Mainly vegetable		15 days	17	3.13	not available	not available	0.9	0.47	0.11	1	0.08	0.13	0.1	0.17	0.02	0.06	0.76	0.14	0.13	0.5	4.04	0.28	12	0.26	5.92	1.28	4.625	0.925926	0.189655	0.853933	14.8	not available	not available	4.05	1.77	0.09	1.38	0.85	0.68
11	Chrysikou, Gemenetzis et al. (2008)	Tagarades, Northern Greece, July 15, 2006	Landfill fire	Sever	0.5–10 km from the landfill	S4	Soil	0-5 cm		Mainly vegetable		15 days	17	3.13	not available	not available	0.9	0.47	0.11	1	0.08	0.13	0.1	0.17	0.02	0.06	0.76	0.14	0.13	0.5	4.04	0.28	12	0.26	5.92	1.28	4.625	0.925926	0.189655	0.853933	1.62	not available	not available	0.25	1.5	0.11	1	0.37	0.13
11	Chrysikou, Gemenetzis et al. (2008)	Tagarades, Northern Greece, July 15, 2006	Landfill fire	Sever	0.5–10 km from the landfill	S5	Soil	0-5 cm		Mainly vegetable		15 days	17	3.13	not available	not available	0.9	0.47	0.11	1	0.08	0.13	0.1	0.17	0.02	0.06	0.76	0.14	0.13	0.5	4.04	0.28	12	0.26	5.92	1.28	4.625	0.925926	0.189655	0.853933	0.88	not available	not available	3.52	1.38	0.11	0.63	0.5	0.5
11	Chrysikou, Gemenetzis et al. (2008)	Tagarades, Northern Greece, July 15, 2006	Landfill fire	Sever	0.5–10 km from the landfill	S6	Soil	0-5 cm		Mainly vegetable		15 days	17	3.13	not available	not available	0.9	0.47	0.11	1	0.08	0.13	0.1	0.17	0.02	0.06	0.76	0.14	0.13	0.5	4.04	0.28	12	0.26	5.92	1.28	4.625	0.925926	0.189655	0.853933	14.9	not available	not available	2.25	10.7	0.11	0.75	3.12	0.13
11	Chrysikou, Gemenetzis et al. (2008)	Tagarades, Northern Greece, July 15, 2006	Landfill fire	Sever	0.5–10 km from the landfill	S7	Soil	0-5 cm		Mainly vegetable		15 days	17	3.13	not available	not available	0.9	0.47	0.11	1	0.08	0.13	0.1	0.17	0.02	0.06	0.76	0.14	0.13	0.5	4.04	0.28	12	0.26	5.92	1.28	4.625	0.925926	0.189655	0.853933	6.07	not available	not available	0.38	5.82	0.11	0.25	1.01	0.13
11	Chrysikou, Gemenetzis et al. (2008)	Tagarades, Northern Greece, July 15, 2006	Landfill fire	Sever	0.5–10 km from the landfill	S8	Soil	0-5 cm		Mainly vegetable		15 days	17	3.13	not available	not available	0.9	0.47	0.11	1	0.08	0.13	0.1	0.17	0.02	0.06	0.76	0.14	0.13	0.5	4.04	0.28	12	0.26	5.92	1.28	4.625	0.925926	0.189655	0.853933	8.38	not available	not available	1.52	14.7	0.11	0.76	1.78	0.13
11	Chrysikou, Gemenetzis et al. (2008)	Tagarades, Northern Greece, July 15, 2006	Landfill fire	Sever	0.5–10 km from the landfill	S9	Soil	0-5 cm		Mainly vegetable		15 days	17	3.13	not available	not available	0.9	0.47	0.11	1	0.08	0.13	0.1	0.17	0.02	0.06	0.76	0.14	0.13	0.5	4.04	0.28	12	0.26	5.92	1.28	4.625	0.925926	0.189655	0.853933	8.61	not available	not available	2.39	1.16	0.11	0.37	0.08	0.13
11	Chrysikou, Gemenetzis et al. (2008)	Tagarades, Northern Greece, July 15, 2006	Landfill fire	Sever	0.5–10 km from the landfill	S1	Vegetation sample			Solanum eleagnifolium		15 days	17	3.4	not available	not available	2.59	0.95	0.12	1.09	1.36	2.18	1.09	0.11	0.14	0.06	0.27	0.14	0.14	7.76	0.27	0.2	21.9	0.48	12.78	0.86	14.8605	0.444898	0.11215	0.658537	6.59	not available	not available	5.79	3.63	0.14	2.15	0.67	0.27
11	Chrysikou, Gemenetzis et al. (2008)	Tagarades, Northern Greece, July 15, 2006	Landfill fire	Sever	0.5–10 km from the landfill	S2	Vegetation sample			Solanum eleagnifolium		15 days	17	3.4	not available	not available	2.59	0.95	0.12	1.09	1.36	2.18	1.09	0.11	0.14	0.06	0.27	0.14	0.14	7.76	0.27	0.2	21.9	0.48	12.78	0.86	14.8605	0.444898	0.11215	0.658537	12.5	not available	not available	4.47	3.6	0.13	1.33	1.07	0.27
11	Chrysikou, Gemenetzis et al. (2008)	Tagarades, Northern Greece, July 15, 2006	Landfill fire	Sever	0.5–10 km from the landfill	S3	Vegetation sample			Solanum eleagnifolium		15 days	17	3.4	not available	not available	2.59	0.95	0.12	1.09	1.36	2.18	1.09	0.11	0.14	0.06	0.27	0.14	0.14	7.76	0.27	0.2	21.9	0.48	12.78	0.86	14.8605	0.444898	0.11215	0.658537	7.16	not available	not available	4.55	5.35	0.27	4.95	0.8	0.31
11	Chrysikou, Gemenetzis et al. (2008)	Tagarades, Northern Greece, July 15, 2006	Landfill fire	Sever	0.5–10 km from the landfill	S4	Vegetation sample			Solanum eleagnifolium		15 days	17	3.4	not available	not available	2.59	0.95	0.12	1.09	1.36	2.18	1.09	0.11	0.14	0.06	0.27	0.14	0.14	7.76	0.27	0.2	21.9	0.48	12.78	0.86	14.8605	0.444898	0.11215	0.658537	10.3	not available	not available	1.63	1.63	0.12	1.08	0.54	0.14
11	Chrysikou, Gemenetzis et al. (2008)	Tagarades, Northern Greece, July 15, 2006	Landfill fire	Sever	0.5–10 km from the landfill	S5	Vegetation sample			Solanum eleagnifolium		15 days	17	3.4	not available	not available	2.59	0.95	0.12	1.09	1.36	2.18	1.09	0.11	0.14	0.06	0.27	0.14	0.14	7.76	0.27	0.2	21.9	0.48	12.78	0.86	14.8605	0.444898	0.11215	0.658537	3.32	not available	not available	3.86	1.73	0.11	1.06	0.27	0.13
11	Chrysikou, Gemenetzis et al. (2008)	Tagarades, Northern Greece, July 15, 2006	Landfill fire	Sever	0.5–10 km from the landfill	S6	Vegetation sample			Solanum eleagnifolium		15 days	17	3.4	not available	not available	2.59	0.95	0.12	1.09	1.36	2.18	1.09	0.11	0.14	0.06	0.27	0.14	0.14	7.76	0.27	0.2	21.9	0.48	12.78	0.86	14.8605	0.444898	0.11215	0.658537	3.32	not available	not available	0.66	0.93	0.11	1.06	0.27	0.13
11	Chrysikou, Gemenetzis et al. (2008)	Tagarades, Northern Greece, July 15, 2006	Landfill fire	Sever	0.5–10 km from the landfill	S7	Vegetation sample			Solanum eleagnifolium		15 days	17	3.4	not available	not available	2.59	0.95	0.12	1.09	1.36	2.18	1.09	0.11	0.14	0.06	0.27	0.14	0.14	7.76	0.27	0.2	21.9	0.48	12.78	0.86	14.8605	0.444898	0.11215	0.658537	5.08	not available	not available	1	1.47	0.11	1.07	1.34	0.27
11	Chrysikou, Gemenetzis et al. (2008)	Tagarades, Northern Greece, July 15, 2006	Landfill fire	Sever	0.5–10 km from the landfill	S8	Vegetation sample			Solanum eleagnifolium		15 days	17	3.4	not available	not available	2.59	0.95	0.12	1.09	1.36	2.18	1.09	0.11	0.14	0.06	0.27	0.14	0.14	7.76	0.27	0.2	21.9	0.48	12.78	0.86	14.8605	0.444898	0.11215	0.658537	3.39	not available	not available	7.31	15.4	0.14	1.49	0.41	0.14
11	Chrysikou, Gemenetzis et al. (2008)	Tagarades, Northern Greece, July 15, 2006	Landfill fire	Sever	0.5–10 km from the landfill	S9	Vegetation sample			Solanum eleagnifolium		15 days	17	3.4	not available	not available	2.59	0.95	0.12	1.09	1.36	2.18	1.09	0.11	0.14	0.06	0.27	0.14	0.14	7.76	0.27	0.2	21.9	0.48	12.78	0.86	14.8605	0.444898	0.11215	0.658537	3.32	not available	not available	3.86	3.19	0.13	1.06	0.27	0.13
11	Chrysikou, Gemenetzis et al. (2008)	Tagarades, Northern Greece, July 15, 2006	Landfill fire	/	35 km away from the landfill upwind to the plume smoke.	S10_reference site	/			Trifolium		15 days	17	3.4	not available	not available	2.59	0.95	0.12	1.09	1.36	2.18	1.09	0.11	0.14	0.06	0.27	0.14	0.14	7.76	0.27	0.2	21.9	0.48	12.78	0.86	14.8605	0.444898	not available	0.658537	3.4	not available	not available	2.59	0.95	0.12	1.09	1.36	2.18
12	García-Falcón, Soto-González et al. (2006)	Orense, Northwestern Spain, June 22, 2003	/	/	Unburnt rural woodland, 20 km from the burnt area.	Unburnt rural woodland 02/07/03	Soil	0-5 cm	817	Pine	Forest	10 days	8	not available	not available	not available	not available	not available	not available	not available	not available	not available	not available	not available	not available	not available	not available	not available	not available	not available	not available	not available	not available	not available	not available	not available	not available	not available	not available	not available	not available	not available	not available	not available	not available	not available	13±1	not available	not detected
12	García-Falcón, Soto-González et al. (2006)	Orense, Northwestern Spain, June 22, 2003	Periodic forest wildfires	Mild	Burnt periurban woodland.	Burnt periurban woodland 02/07/03	Soil	1-5 cm	817	Pine	Forest	10 days	8	not available	not available	not available	not available	not available	not available	55±2	not available	14±1	not available	32±1	16±1	9±1	25±1	not detected	22±3	not available	not available	not available	173	17.71	69	104	0.663462	not available	not available	0.531915	not available	not available	not available	not available	not available	not available	64±9	not available	15±3
12	García-Falcón, Soto-González et al. (2006)	Orense, Northwestern Spain, June 22, 2003	Periodic forest wildfires	Mild	Burnt periurban woodland.	Burnt periurban woodland 22/07/03	Soil	1-5 cm	817	Pine	Forest	30 days	8	not available	not available	not available	not available	not available	not available	55±2	not available	14±1	not available	32±1	16±1	9±1	25±1	not detected	22±3	not available	not available	not available	173	17.71	69	104	0.663462	not available	not available	0.531915	not available	not available	not available	not available	not available	not available	75±16	not available	19±3
12	García-Falcón, Soto-González et al. (2006)	Orense, Northwestern Spain, June 22, 2003	Periodic forest wildfires	Mild	Burnt periurban woodland.	Burnt periurban woodland 18/09/03	Soil	1-5 cm	817	Pine	Forest	88 days	8	not available	not available	not available	not available	not available	not available	55±2	not available	14±1	not available	32±1	16±1	9±1	25±1	not detected	22±3	not available	not available	not available	173	17.71	69	104	0.663462	not available	not available	0.531915	not available	not available	not available	not available	not available	not available	66±14	not available	17±3
12	García-Falcón, Soto-González et al. (2006)	Orense, Northwestern Spain, June 22, 2003	/	/	Nearby unburnt periurban woodland, 500 m from the burnt area.	Unburnt nearby periurban woodland 19/12/03	Soil	1-5 cm	817	Pine	Forest	180 days	8	not available	not available	not available	not available	not available	not available	not available	not available	not available	not available	not available	not available	not available	not available	not available	not available	not available	not available	not available	173	17.71	69	104	0.663462	not available	not available	0.531915	not available	not available	not available	not available	not available	not available	not available	not available	not available
12	García-Falcón, Soto-González et al. (2006)	Orense, Northwestern Spain, June 22, 2003	Periodic forest wildfires	Mild	Burnt periurban woodland.	Burnt periurban woodland 19/12/03	Soil	1-5 cm	817	Pine	Forest	180 days	8	not available	not available	not available	not available	not available	not available	not available	not available	not available	not available	not available	not available	not available	not available	not available	not available	not available	not available	not available	173	17.71	69	104	0.663462	not available	not available	0.531915	not available	not available	not available	not available	not available	not available	not available	not available	not available
12	García-Falcón, Soto-González et al. (2006)	Orense, Northwestern Spain, June 22, 2003	/	/	Distant unburnt periurban woodland, 5 km from the burnt area.	Unburnt nearby periurban woodland 19/12/03	Soil	1-5 cm	817	Pine	Forest	315 days	8	not available	not available	not available	not available	not available	not available	55±2	not available	14±1	not available	32±1	16±1	9±1	25±1	not detected	22±3	not available	not available	not available	173	17.71	69	104	0.663462	not available	not available	0.531915	not available	not available	not available	not available	not available	not available	255±50	not available	95±21
12	García-Falcón, Soto-González et al. (2006)	Orense, Northwestern Spain, June 22, 2003	Periodic forest wildfires	Mild	Burnt periurban woodland.	Burnt periurban woodland 06/05/04	Soil	1-5 cm	817	Pine	Forest	315 days	8	not available	not available	not available	not available	not available	not available	55±2	not available	14±1	not available	32±1	16±1	9±1	25±1	not detected	22±3	not available	not available	not available	173	17.71	69	104	0.663462	not available	not available	0.531915	not available	not available	not available	not available	not available	not available	31±10	not available	13±3
13	Liu Falin, Xiang Peng (2016)	Zhuzhou, Hunan, China, January 10, 2014	Forest wildfire	Mild	Hills (away from industrial and residential areas)	Site I	Soil	0-3 cm		Fir and masson pine	Forest	1 month	16	4.8	0.2	4.7	4.3	7.1	1.2	5	3.5	2.7	4.5	4.8	3.6	1.6	1.2	0.6	1	not available	not available	not available	50.8	3.5086	38	12.8	2.96875	0.588235	0.144578	0.545455	419	125	31.5	109	298	201	230	116	59
13	Liu Falin, Xiang Peng (2016)	Zhuzhou, Hunan, China, January 10, 2014	Forest wildfire	Moderate	Hills (away from industrial and residential areas)	Site II	Soil	0-3 cm		Fir and masson pine	Forest	1 month	16	4.8	0.2	4.7	4.3	7.1	1.2	5	3.5	2.7	4.5	4.8	3.6	1.6	1.2	0.6	1	not available	not available	not available	50.8	3.5086	38	12.8	2.96875	0.588235	0.144578	0.545455	393	34	8.5	105	231	141	71	43	18
13	Liu Falin, Xiang Peng (2016)	Zhuzhou, Hunan, China, January 10, 2014	Forest wildfire	Sever	Hills (away from industrial and residential areas)	Site III	Soil	0-3 cm		Fir and masson pine	Forest	1 month	16	4.8	0.2	4.7	4.3	7.1	1.2	5	3.5	2.7	4.5	4.8	3.6	1.6	1.2	0.6	1	not available	not available	not available	50.8	3.5086	38	12.8	2.96875	0.588235	0.144578	0.545455	264	12	5.8	77	168	117	54	27	9
13	Liu Falin, Xiang Peng (2016)	Zhuzhou, Hunan, China, January 10, 2014	Forest wildfire	Mild	Hills (away from industrial and residential areas)	Site I	Soil	0-3 cm		Fir and masson pine	Forest	6 months	16	4.8	0.2	4.7	4.3	7.1	1.2	5	3.5	2.7	4.5	4.8	3.6	1.6	1.2	0.6	1	not available	not available	not available	50.8	3.5086	38	12.8	2.96875	0.588235	0.144578	0.545455	39	24	19	25	105	39	46	51	14
13	Liu Falin, Xiang Peng (2016)	Zhuzhou, Hunan, China, January 10, 2014	Forest wildfire	Moderate	Hills (away from industrial and residential areas)	Site II	Soil	0-3 cm		Fir and masson pine	Forest	6 months	16	4.8	0.2	4.7	4.3	7.1	1.2	5	3.5	2.7	4.5	4.8	3.6	1.6	1.2	0.6	1	not available	not available	not available	50.8	3.5086	38	12.8	2.96875	0.588235	0.144578	0.545455	17	3	3.6	21	51	27	28	22	9
13	Liu Falin, Xiang Peng (2016)	Zhuzhou, Hunan, China, January 10, 2014	Forest wildfire	Sever	Hills (away from industrial and residential areas)	Site III	Soil	0-3 cm		Fir and masson pine	Forest	6 months	16	4.8	0.2	4.7	4.3	7.1	1.2	5	3.5	2.7	4.5	4.8	3.6	1.6	1.2	0.6	1	not available	not available	not available	50.8	3.5086	38	12.8	2.96875	0.588235	0.144578	0.545455	3	0.5	not detected	19	44	15	22	17	4
13	Liu Falin, Xiang Peng (2016)	Zhuzhou, Hunan, China, January 10, 2014	Forest wildfire	Mild	Hills (away from industrial and residential areas)	Site I	Soil	0-3 cm		Fir and masson pine	Forest	12 months	16	4.8	0.2	4.7	4.3	7.1	1.2	5	3.5	2.7	4.5	4.8	3.6	1.6	1.2	0.6	1	not available	not available	not available	50.8	3.5086	38	12.8	2.96875	0.588235	0.144578	0.545455	32	11	9	21	48	29	41	36	8.5
13	Liu Falin, Xiang Peng (2016)	Zhuzhou, Hunan, China, January 10, 2014	Forest wildfire	Moderate	Hills (away from industrial and residential areas)	Site II	Soil	0-3 cm		Fir and masson pine	Forest	12 months	16	4.8	0.2	4.7	4.3	7.1	1.2	5	3.5	2.7	4.5	4.8	3.6	1.6	1.2	0.6	1	not available	not available	not available	50.8	3.5086	38	12.8	2.96875	0.588235	0.144578	0.545455	14	1	1.5	14	39	16	25	17	6
13	Liu Falin, Xiang Peng (2016)	Zhuzhou, Hunan, China, January 10, 2014	Forest wildfire	Sever	Hills (away from industrial and residential areas)	Site III	Soil	0-3 cm		Fir and masson pine	Forest	12 months	16	4.8	0.2	4.7	4.3	7.1	1.2	5	3.5	2.7	4.5	4.8	3.6	1.6	1.2	0.6	1	not available	not available	not available	50.8	3.5086	38	12.8	2.96875	0.588235	0.144578	0.545455	1.5	not detected	not detected	9	20	4	19	11	2
13	Liu Falin, Xiang Peng (2016)	Zhuzhou, Hunan, China, January 10, 2014	Forest wildfire	Moderate	Hills (away from industrial and residential areas)	Site IV	Soil	0-3 cm		Fir and masson pine	Forest	1 month	16	4.8	0.2	4.7	4.3	7.1	1.2	5	3.5	2.7	4.5	4.8	3.6	1.6	1.2	0.6	1	not available	not available	not available	50.8	3.5086	38	12.8	2.96875	0.588235	0.144578	0.545455	126	95	41	27	141	35	39	35	16
13	Liu Falin, Xiang Peng (2016)	Zhuzhou, Hunan, China, January 10, 2014	Forest wildfire	Moderate	Hills (away from industrial and residential areas)	Site IV	Soil	3-10 cm		Fir and masson pine	Forest	1 month	16	4.8	0.2	4.7	4.3	7.1	1.2	5	3.5	2.7	4.5	4.8	3.6	1.6	1.2	0.6	1	not available	not available	not available	50.8	3.5086	38	12.8	2.96875	0.588235	0.144578	0.545455	44	31	14	7.8	46	10	11.5	9	4.5
13	Liu Falin, Xiang Peng (2016)	Zhuzhou, Hunan, China, January 10, 2014	Forest wildfire	Moderate	Hills (away from industrial and residential areas)	Site IV	Ash			Fir and masson pine	Forest	1 month	16	4.8	0.2	4.7	4.3	7.1	1.2	5	3.5	2.7	4.5	4.8	3.6	1.6	1.2	0.6	1	not available	not available	not available	50.8	3.5086	38	12.8	2.96875	0.588235	0.144578	0.545455	147	77	35	41	179	47	47	40	24
13	Liu Falin, Xiang Peng (2016)	Zhuzhou, Hunan, China, January 10, 2014	Forest wildfire	Sever	Hills (away from industrial and residential areas)	Site V	Soil	0-3 cm		Fir and masson pine	Forest	1 month	16	4.8	0.2	4.7	4.3	7.1	1.2	5	3.5	2.7	4.5	4.8	3.6	1.6	1.2	0.6	1	not available	not available	not available	50.8	3.5086	38	12.8	2.96875	0.588235	0.144578	0.545455	99	not detected	not detected	12	27	6	11	9	8
13	Liu Falin, Xiang Peng (2016)	Zhuzhou, Hunan, China, January 10, 2014	Forest wildfire	Sever	Hills (away from industrial and residential areas)	Site V	Soil	3-10 cm		Fir and masson pine	Forest	1 month	16	4.8	0.2	4.7	4.3	7.1	1.2	5	3.5	2.7	4.5	4.8	3.6	1.6	1.2	0.6	1	not available	not available	not available	50.8	3.5086	38	12.8	2.96875	0.588235	0.144578	0.545455	21	not detected	not detected	3	7	1.5	3.1	2.5	3.5
13	Liu Falin, Xiang Peng (2016)	Zhuzhou, Hunan, China, January 10, 2014	Forest wildfire	Sever	Hills (away from industrial and residential areas)	Site V	Ash			Fir and masson pine	Forest	1 month	16	4.8	0.2	4.7	4.3	7.1	1.2	5	3.5	2.7	4.5	4.8	3.6	1.6	1.2	0.6	1	not available	not available	not available	50.8	3.5086	38	12.8	2.96875	0.588235	0.144578	0.545455	215	31	not detected	21	103	30	31	25	19
14	Rey-Salgueiro, Martinez-Carballo et al. (2018)	NW Spain	Forest wildfire	Moderate		E. arborea	Litter	3.5-4.0 cm	1700	Erica arborea	Shrubland	3-7 days	10	not available	not available	not available	not available	not available	not available	3.7±0.4	2.5±0.2	not available	0.76±0.6	1.8±0.9	0.72±0.70	0.49±0.85	not available	not available	not available	not available	not available	not available	10±1.3	not available	6.9±0.85	3.03±0.82	not available	not available	not available	not available	not available	not available	not available	not available	not available	not available	13±4	9.8±6	not available
14	Rey-Salgueiro, Martinez-Carballo et al. (2018)	NW Spain	Forest wildfire	Sever		E. arborea	Litter	3.5-4.1 cm	1700	Erica arborea	Shrubland	3-7 days	10	not available	not available	not available	not available	not available	not available	3.7±0.4	2.5±0.2	not available	0.76±0.6	1.8±0.9	0.72±0.70	0.49±0.85	not available	not available	not available	not available	not available	not available	10±1.3	not available	6.9±0.85	3.03±0.82	not available	not available	not available	not available	not available	not available	not available	not available	not available	not available	8.8±7	7.8±9.0	not available
14	Rey-Salgueiro, Martinez-Carballo et al. (2018)	Cuenca, eastern Spain	Forest wildfire	Moderate		P. nigra	Litter	6.0-6.9 cm	500	Pinus nigra	Forest	3-7 days	10	not available	not available	not available	not available	not available	not available	4.1±0.45	2.0±0.6	not available	not detected	1.2±0.8	0.54±0.5	0.81±0.60	not available	not available	not available	not available	not available	not available	8.6±0.11	not available	6.1±0.53	2.5±0.6	not available	not available	not available	not available	not available	not available	not available	not available	not available	not available	10±5	3.2±4.0	not available
14	Rey-Salgueiro, Martinez-Carballo et al. (2018)	Cuenca, eastern Spain	Forest wildfire	Sever		P. nigra	Litter	6.0-6.9 cm	500	Pinus nigra	Forest	3-7 days	10	not available	not available	not available	not available	not available	not available	4.1±0.45	2.0±0.6	not available	not detected	1.2±0.8	0.54±0.5	0.81±0.60	not available	not available	not available	not available	not available	not available	8.6±0.11	not available	6.1±0.53	2.5±0.6	not available	not available	not available	not available	not available	not available	not available	not available	not available	not available	10±6.5	4.3±4.0	not available
14	Rey-Salgueiro, Martinez-Carballo et al. (2018)	NW Spain	Forest wildfire	Moderate		P. pinaster	Litter	3.5-4.0 cm	1700	P. pinaster	Shrubland	3-7 days	10	not available	not available	not available	not available	not available	not available	6.5±2	3.1±1.2	not available	2.5	4.5±2.0	2.0±1.5	2.4±1.9	not available	not available	not available	not available	not available	not available	21±3.2	not available	12±1.7	8.9±1.8	not available	not available	not available	not available	not available	not available	not available	not available	not available	not available	26±4.6	12±4.0	not available
14	Rey-Salgueiro, Martinez-Carballo et al. (2018)	NW Spain	Forest wildfire	Sever		P. pinaster	Litter	3.5-4.1 cm	1700	P. pinaster	Shrubland	3-7 days	10	not available	not available	not available	not available	not available	not available	6.5±2	3.1±1.2	not available	2.5	4.5±2.0	2.0±1.5	2.4±1.9	not available	not available	not available	not available	not available	not available	21±3.2	not available	12±1.7	8.9±1.8	not available	not available	not available	not available	not available	not available	not available	not available	not available	not available	5.3±5.1	2.1±5.4	not available
14	Rey-Salgueiro, Martinez-Carballo et al. (2018)	NW Spain	Forest wildfire	Moderate		U. europaeus	Litter	6.0-6.9 cm	1700	Ulex europaeus	Forest	3-7 days	10	not available	not available	not available	not available	not available	not available	10±5	4.8±4.0	not available	3.6±4.5	6.6±5.0	2.5±3.0	2.7±2.6	not available	not available	not available	not available	not available	not available	30±8.5	not available	18±4.8	12±3.7	not available	not available	not available	not available	not available	not available	not available	not available	not available	not available	14±8.3	9.0±7.0	not available
14	Rey-Salgueiro, Martinez-Carballo et al. (2018)	NW Spain	Forest wildfire	Sever		U. europaeus	Litter	6.0-6.9 cm	1700	Ulex europaeus	Forest	3-7 days	10	not available	not available	not available	not available	not available	not available	10±5	4.8±4.0	not available	3.6±4.5	6.6±5.0	2.5±3.0	2.7±2.6	not available	not available	not available	not available	not available	not available	30±8.5	not available	18±4.8	12±3.7	not available	not available	not available	not available	not available	not available	not available	not available	not available	not available	8.9±6	6.4±5.0	not available
15	Campo, Lorenzo et al. (2017)	Azuébar, Castellón, Spain, August 28, 2014	Forest wildfire	Moderate-sever	Luvisol Chromic Skeletic type soil, clay-loam texture	Top_the eroding zone	Under canopy soil	0-2cm	450		Shrubland	22 days	16	7	0.6	2.3	2.3	14.7	0.9	9.5	6.2	2.1	9.3	14.4	3.2	6.8	8.8	not detected	7.1	not available	not available	not available	95.2	not available	not available	not available	not available	not available	not available	not available	547	30.5	9.7	37.2	159	13.6	43.2	34.4	11.6
15	Campo, Lorenzo et al. (2017)	Azuébar, Castellón, Spain, August 28, 2014	Forest wildfire	Moderate-sever	Luvisol Chromic Skeletic type soil, clay-loam texture	Top_the eroding zone	Under canopy soil	2-5cm	450		Shrubland	22 days	16	4.5	0.2	2.9	1.9	8.4	0.6	7.4	5.8	2.5	8.2	10.5	3	4.7	5.1	not detected	6.6	not available	not available	not available	72.3	not available	not available	not available	not available	not available	not available	not available	77.6	7.9	5.1	12.8	45.2	4.7	18	15.4	5.2
15	Campo, Lorenzo et al. (2017)	Azuébar, Castellón, Spain, August 28, 2014	Forest wildfire	Moderate-sever	Luvisol Chromic Skeletic type soil, clay-loam texture	Top_the eroding zone	Inter-plants or bare soil	0-2cm	450		Shrubland	22 days	16	6.5	not detected	1.6	2	6.2	0.4	3.9	3.7	1.2	3.8	4.6	1.6	not detected	2.4	not detected	3.7	not available	not available	not available	41.6	not available	not available	not available	not available	not available	not available	not available	327	20.6	7.8	28.5	167	15.5	51	37.4	13.5
15	Campo, Lorenzo et al. (2017)	Azuébar, Castellón, Spain, August 28, 2014	Forest wildfire	Moderate-sever	Luvisol Chromic Skeletic type soil, clay-loam texture	Top_the eroding zone	Inter-plants or bare soil	2-5cm	450		Shrubland	22 days	16	3.9	not detected	2	3.2	6.9	0.3	3.3	2.9	1	2.8	3.7	1.1	3.4	2.2	not detected	2.8	not available	not available	not available	39.5	not available	not available	not available	not available	not available	not available	not available	33.1	3.9	3.2	7.2	30.2	2.5	10.6	8.6	3.5
15	Campo, Lorenzo et al. (2017)	Azuébar, Castellón, Spain, August 28, 2014	Forest wildfire	Moderate-sever	Luvisol Chromic Skeletic type soil, clay-loam texture	Middle_the transport site	Under canopy soil	0-2cm	450		Shrubland	22 days	16	43.3	not detected	2.2	1.8	10.1	0.9	7.7	5.4	2.2	10.5	13.7	2.6	5	8.2	not detected	6.6	not available	not available	not available	120.2	not available	not available	not available	not available	not available	not available	not available	803	26.9	12	41	198	21	50.2	30.7	8.9
15	Campo, Lorenzo et al. (2017)	Azuébar, Castellón, Spain, August 28, 2014	Forest wildfire	Moderate-sever	Luvisol Chromic Skeletic type soil, clay-loam texture	Middle_the transport site	Under canopy soil	2-5cm	450		Shrubland	22 days	16	4.6	not detected	1.6	2.7	9.6	0.5	6.5	5.6	2.5	7.2	8.8	2.6	5.4	4.9	not detected	4.9	not available	not available	not available	67.4	not available	not available	not available	not available	not available	not available	not available	173	8.5	4.8	17.2	71.2	6.8	18.7	15.4	0.5
15	Campo, Lorenzo et al. (2017)	Azuébar, Castellón, Spain, August 28, 2014	Forest wildfire	Moderate-sever	Luvisol Chromic Skeletic type soil, clay-loam texture	Middle_the transport site	Inter-plants or bare soil	0-2cm	450		Shrubland	22 days	16	4.8	not detected	1.3	1.4	5.8	0.3	3.2	0.2	0.9	6.2	6.3	1.9	not detected	2.7	not detected	3.8	not available	not available	not available	38.8	not available	not available	not available	not available	not available	not available	not available	127	8.6	4	12.1	102	6.4	29.5	23.1	7
15	Campo, Lorenzo et al. (2017)	Azuébar, Castellón, Spain, August 28, 2014	Forest wildfire	Moderate-sever	Luvisol Chromic Skeletic type soil, clay-loam texture	Middle_the transport site	Inter-plants or bare soil	2-5cm	450		Shrubland	22 days	16	8.6	not detected	1.5	1.5	4.3	0.3	1.8	1.9	0.4	3.2	3.4	1.1	not detected	1.4	not detected	4.4	not available	not available	not available	33.8	not available	not available	not available	not available	not available	not available	not available	45.1	7.6	4.3	7.2	35.6	3.3	11.6	9.7	3
15	Campo, Lorenzo et al. (2017)	Azuébar, Castellón, Spain, August 28, 2014	Forest wildfire	Moderate-sever	Luvisol Chromic Skeletic type soil, clay-loam texture	Foot_the depositional zone	Under canopy soil	0-2cm	450		Shrubland	22 days	16	4.4	not detected	1.2	1.1	5.7	0.3	4.4	3.9	2	7.1	5.9	1.9	3.5	3.9	not detected	4.2	not available	not available	not available	49.5	not available	not available	not available	not available	not available	not available	not available	631	23.6	12.1	36.5	214	27.2	54	27.9	9
15	Campo, Lorenzo et al. (2017)	Azuébar, Castellón, Spain, August 28, 2014	Forest wildfire	Moderate-sever	Luvisol Chromic Skeletic type soil, clay-loam texture	Foot_the depositional zone	Under canopy soil	2-5cm	450		Shrubland	22 days	16	10.4	not detected	1.3	2.2	5.3	not detected	3.3	2.9	1.2	5.3	4.5	1.4	not detected	2.4	not detected	not detected	not available	not available	not available	40.2	not available	not available	not available	not available	not available	not available	not available	184	7.1	6.1	11.5	73.7	5.4	17.7	11	4.8
15	Campo, Lorenzo et al. (2017)	Azuébar, Castellón, Spain, August 28, 2014	Forest wildfire	Moderate-sever	Luvisol Chromic Skeletic type soil, clay-loam texture	Foot_the depositional zone	Inter-plants or bare soil	0-2cm	450		Shrubland	22 days	16	4.7	not detected	1.4	1.2	6.1	0.8	4.4	4.1	1.9	6	7.6	2.3	NF	3.5	not detected	5.3	not available	not available	not available	49.3	not available	not available	not available	not available	not available	not available	not available	202	8.3	4.8	15.5	108	9.8	24.1	17.9	5.9
15	Campo, Lorenzo et al. (2017)	Azuébar, Castellón, Spain, August 28, 2014	Forest wildfire	Moderate-sever	Luvisol Chromic Skeletic type soil, clay-loam texture	Foot_the depositional zone	Inter-plants or bare soil	2-5cm	450		Shrubland	22 days	16	4.1	0.7	1.3	1	5	1.3	3	2.7	1.8	3.7	5.1	1.8	not detected	2.2	0.3	6.3	not available	not available	not available	40.3	not available	not available	not available	not available	not available	not available	not available	74.7	2.6	2.8	5.7	41.6	3.3	12.1	8.2	2.6
15	Campo, Lorenzo et al. (2017)	Azuébar, Castellón, Spain, August 28, 2014	Forest wildfire	Moderate-sever	Luvisol Chromic Skeletic type soil, clay-loam texture	Foot_the depositional zone	Sediments		450			78 days	16	not available	not available	not available	not available	not available	not available	not available	not available	not available	not available	not available	not available	not available	not available	not available	not available	not available	not available	not available	not available	not available	not available	not available	not available	not available	not available	not available	1751	84	20.5	119.2	498.2	88.5	166.7	95.5	45.3
15	Campo, Lorenzo et al. (2017)	Azuébar, Castellón, Spain, August 28, 2014	Forest wildfire	Moderate-sever	Luvisol Chromic Skeletic type soil, clay-loam texture	Foot_the depositional zone	Sediments		450			199 days	16	not available	not available	not available	not available	not available	not available	not available	not available	not available	not available	not available	not available	not available	not available	not available	not available	not available	not available	not available	not available	not available	not available	not available	not available	not available	not available	not available	522	23.8	7.2	33	207.8	27.9	62.4	41.5	16.7
15	Campo, Lorenzo et al. (2017)	Azuébar, Castellón, Spain, August 28, 2014	Forest wildfire	Moderate-sever	Luvisol Chromic Skeletic type soil, clay-loam texture	Foot_the depositional zone	Sediments		450			291 days	16	not available	not available	not available	not available	not available	not available	not available	not available	not available	not available	not available	not available	not available	not available	not available	not available	not available	not available	not available	not available	not available	not available	not available	not available	not available	not available	not available	72.9	4.3	3.5	4.6	51.4	7.5	22.3	21.2	6.7
15	Campo, Lorenzo et al. (2017)	Azuébar, Castellón, Spain, August 28, 2014	Forest wildfire	Moderate-sever	Luvisol Chromic Skeletic type soil, clay-loam texture	Foot_the depositional zone	Sediments		450			444 days	16	not available	not available	not available	not available	not available	not available	not available	not available	not available	not available	not available	not available	not available	not available	not available	not available	not available	not available	not available	not available	not available	not available	not available	not available	not available	not available	not available	50.6	5.2	2.8	3.7	40.1	9.4	20	19.2	6.5
[truncated: 22 more columns]
