# Supplementary figures and images for: Polycyclic aromatic hydrocarbon occurrence in forest soils in response to fires: a summary across sites
Source: Royal Society of Chemistry journal article supplement (doi:10.1039/d1em00377a), 2021-11-30

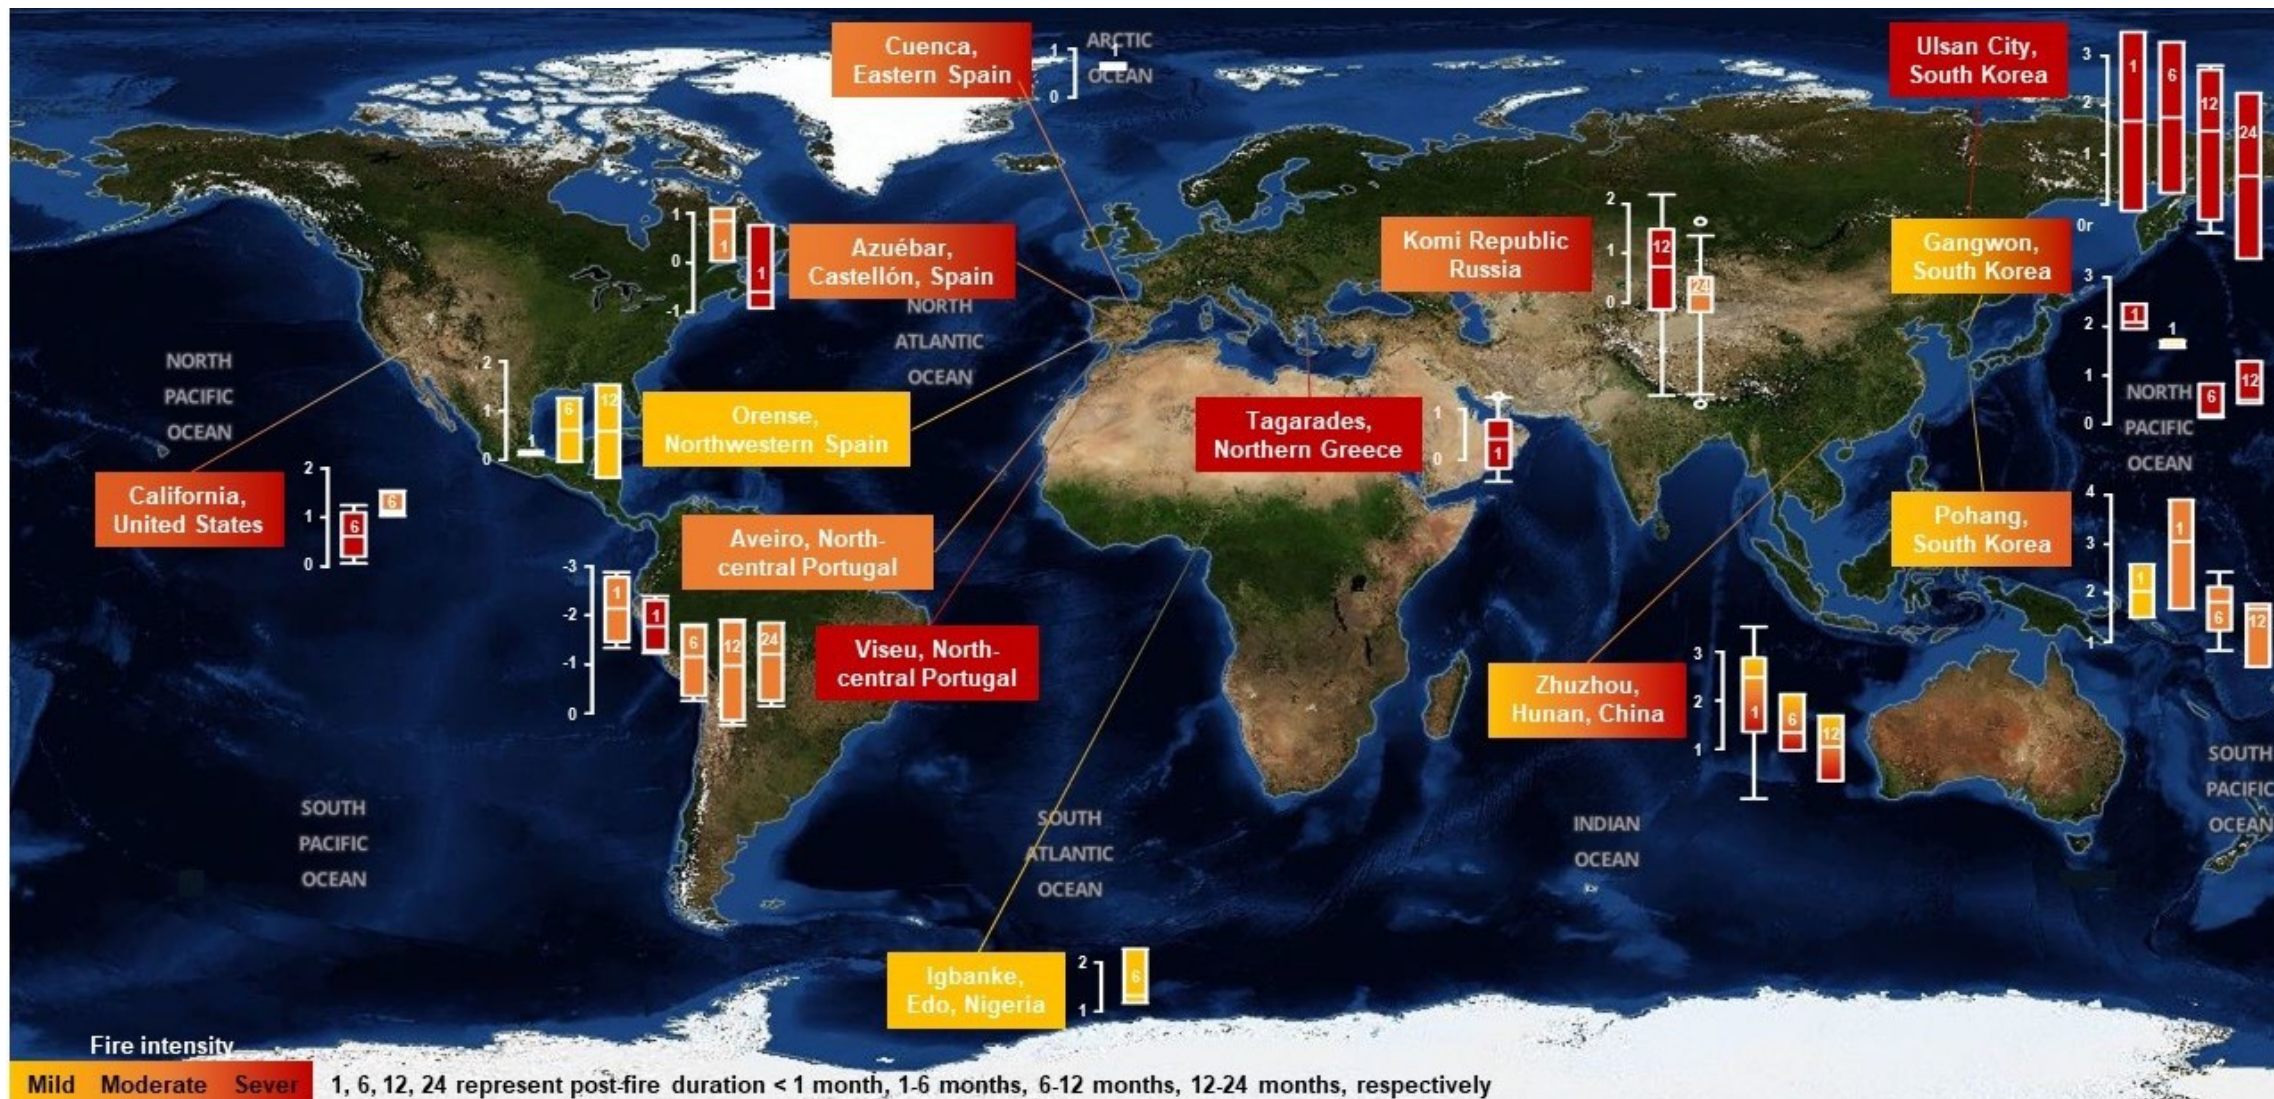

Supplement: d1em00377a3.pdf [file d1em00377a3.pdf]

(a) Sample depth

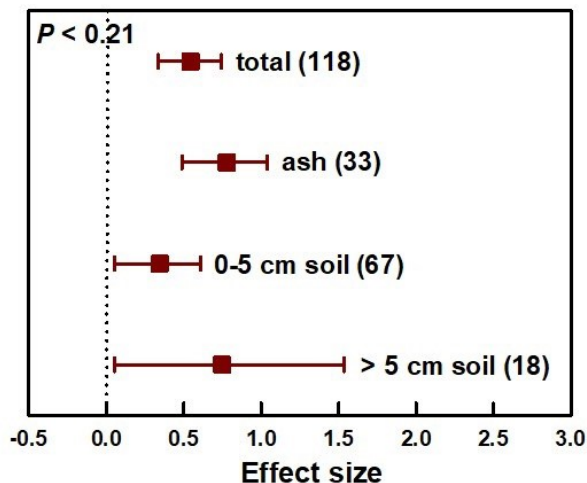

(b) Fire intensity

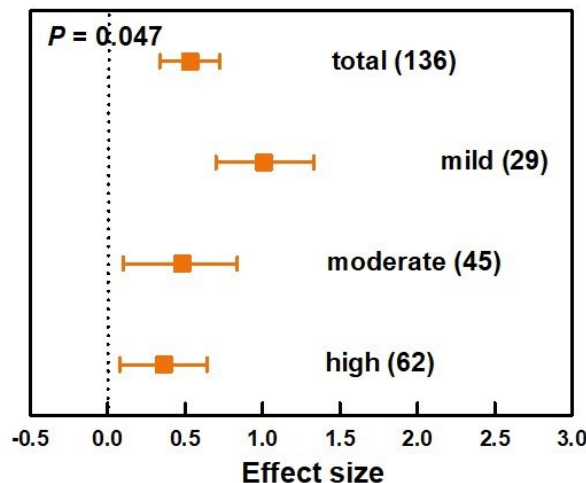

(c) Post-fire duration

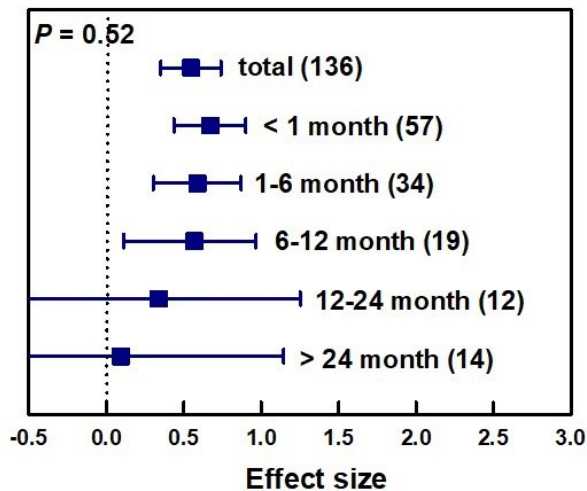

(d) Vegetation type

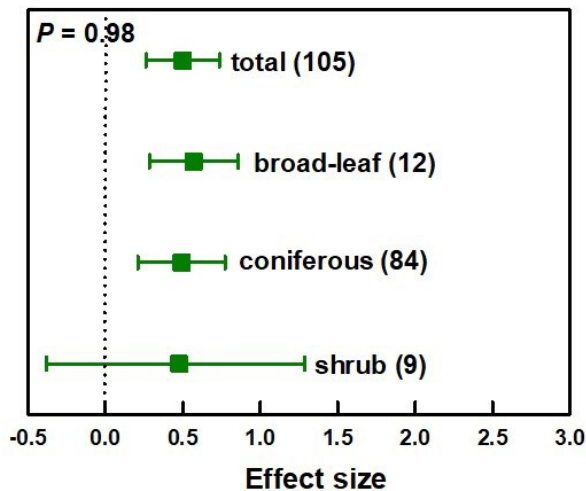

Supplement: d1em00377a4.pdf [file d1em00377a4.pdf]
